# Supplementary material for: Photophysical properties of Pt(ii) complexes based on the benzoquinoline (bzq) ligand with OLED implication: a theoretical study
Source: Royal Society of Chemistry journal article supplement (doi:10.1039/d4ra03334e), 2024-01-01
Supplement: d4ra03334e1.pdf [file d4ra03334e1.pdf]

### Supplementary Information File:

#### **Photophysical Properties of Pt (II) Complexes based on the Benzoquinoline (*bzq*) Ligand with OLED Implication: a Theoretical Study**

Batool Moradpour Reza Omidyan\*

This supplementary file contains the following information:

- 1) Comparison of the  $S_0$  and  $T_1$  optimized geometries of our studied complexes.
- 2) Selected optimized geometry parameters of 3a-4a complexes in the  $S_0$  and the  $T_1$  states.
- 3) Electronic structures (MO contributions) of the studied complexes, determined at the SCF/cc-pVDZ/def2-TZVP (Pt) level of theory.
- 4) The vertical electronic transition energies of considered complexes (TD-DFT/B3LYP/cc-pVDZ/def2-TZVP(Pt) level of theory.
- 5) Optical properties and Exciton generation fractions  $\chi_T$  (%) of selected systems
- 6) The XYZ coordinates of the optimized structure of our eight complexes.

**Figure S1)** Comparison the  $S_0$  and  $T_1$  optimized geometries of our studied complexes.

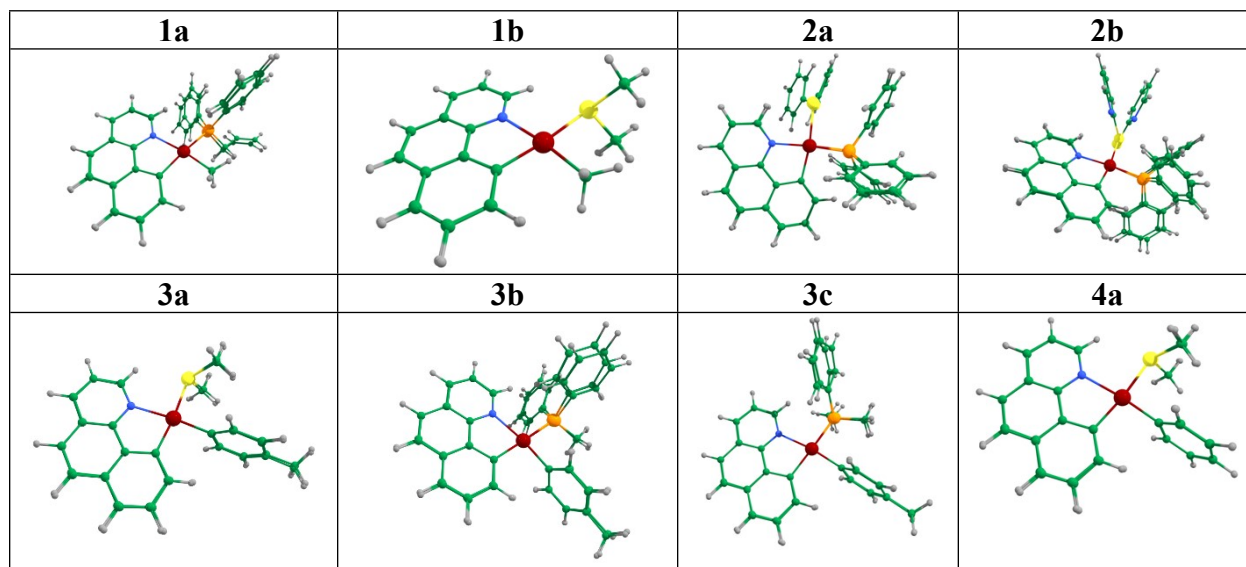

| Complex   | State              | Bond length (Å) |                   |                   |       | Bond angle/degree   |                     |                      | Dihedral angle/deg     |                                     |
|-----------|--------------------|-----------------|-------------------|-------------------|-------|---------------------|---------------------|----------------------|------------------------|-------------------------------------|
|           |                    | Pt-N            | Pt-C <sub>1</sub> | Pt-C <sub>2</sub> | Pt-S  | N-Pt-C <sub>1</sub> | N-Pt-C <sub>2</sub> | C <sub>1</sub> -Pt-S | C <sub>1</sub> -N-Pt-S | N-C <sub>1</sub> -Pt-C <sub>2</sub> |
| <b>3a</b> |                    |                 |                   |                   |       |                     |                     |                      |                        |                                     |
|           | S <sub>0</sub>     | 2.201           | 2.027             | 2.037             | 2.515 | 80.2                | 174.2               | 174.3                | 180.0                  | 179.7                               |
|           | T <sub>1</sub>     | 2.174           | 1.999             | 2.034             | 2.470 | 80.4                | 174.3               | 173.8                | 179.9                  | 179.8                               |
|           | Exp. <sup>39</sup> | 2.142           | 2.052             | 2.029             | 2.358 | 80.9                | 173.7               | 174.8                | -                      | -                                   |
| <b>3b</b> |                    |                 |                   |                   |       |                     |                     |                      |                        |                                     |
|           | S <sub>0</sub>     | 2.219           | 2.058             | 2.038             | 2.446 | 79.2                | 171.7               | 179.6                | 179.9                  | 179.9                               |
|           | T <sub>1</sub>     | 2.188           | 2.037             | 2.038             | 2.393 | 79.5                | 171.8               | 178.7                | 179.0                  | 179.5                               |
|           | Exp. <sup>40</sup> | 2.136           | 2.054             | 2.008             | 2.301 | 80.2                | 170.4               | 176.7                | -                      | -                                   |
| <b>3c</b> |                    |                 |                   |                   |       |                     |                     |                      |                        |                                     |
|           | S <sub>0</sub>     | 2.215           | 2.060             | 2.037             | 2.431 | 79.3                | 171.9               | 177.7                | 178.3                  | 177.7                               |
|           | T <sub>1</sub>     | 2.184           | 2.037             | 2.038             | 2.383 | 79.6                | 172.1               | 176.8                | 178.9                  | 179.5                               |
|           | Exp. <sup>40</sup> | 2.145           | 2.041             | 2.013             | 2.294 | 80.4                | 170.9               | 176.4                | -                      | -                                   |
| <b>4a</b> |                    |                 |                   |                   |       |                     |                     |                      |                        |                                     |
|           | S <sub>0</sub>     | 2.201           | 2.027             | 2.037             | 2.514 | 80.2                | 174.2               | 174.3                | 180.0                  | 179.8                               |
|           | T <sub>1</sub>     | 2.125           | 1.195             | 2.017             | 2.438 | 80.4                | 174.5               | 173.7                | 180.0                  | 179.8                               |
|           | Exp. <sup>41</sup> | 2.128           | 2.030             | 2.009             | 2.358 | 81.5                | 173.9               | 173.5                | -                      | -                                   |

**Table S1.** Selected optimized geometry parameters of **3a-4a** complexes in the S<sub>0</sub> and the T<sub>1</sub> states at the B3LYP level of theory. The experimental values obtained from the XRD structures have been adopted from the literature.<sup>39-41</sup> The C<sub>2</sub>, P, S, and C<sub>1</sub> indicate bzq Carbon, Phosphorus, Sulfur, and Me carbon atoms connecting R<sub>1</sub> and R<sub>2</sub> ligands to central Pt.

**Table S2.** Frontier molecular orbital contribution (%) in the ground state for complexes **1a-4a**.

1a

| Orbitals | E (eV) | Contribution (%) |     |    |                                                      | Orbital interpretation (from high affect to minimum)                                                    |
|----------|--------|------------------|-----|----|------------------------------------------------------|---------------------------------------------------------------------------------------------------------|
|          |        | Pt               | bzq | Me | P-(Ph) <sub>2</sub> (C <sub>3</sub> H <sub>5</sub> ) |                                                                                                         |
| HOMO-12  | -7.522 | 12               | 45  | -  | 43                                                   | $\pi(\text{bzq}) + \pi(\text{P}(\text{Ph})_2(\text{C}_3\text{H}_5)) + \text{d}(\text{Pt})$              |
| HOMO-7   | -7.041 | 4                | 5   | -  | 91                                                   | $\pi(\text{P}(\text{Ph})_2(\text{C}_3\text{H}_5))$                                                      |
| HOMO-6   | -6.588 | 38               | 42  | 1  | 19                                                   | $\pi(\text{bzq}) + \text{d}(\text{Pt}) + \pi(\text{P}(\text{Ph})_2(\text{C}_3\text{H}_5))$              |
| HOMO-5   | -6.459 | 73               | 10  | 10 | 7                                                    | $\text{d}(\text{Pt}) + \pi(\text{bzq}) + \sigma(\text{Me})$                                             |
| HOMO-4   | -6.370 | 14               | 41  | 2  | 43                                                   | $[\text{n}(\text{P}) + \pi(\text{Ph})_2(\text{C}_3\text{H}_5)] + \pi(\text{bzq}) + \text{d}(\text{Pt})$ |
| HOMO-3   | -6.222 | 21               | 75  | 2  | 3                                                    | $\pi(\text{bzq}) + \text{d}(\text{Pt})$                                                                 |
| HOMO-2   | -6.755 | 70               | 20  | 10 | -                                                    | $\text{d}(\text{Pt}) + \pi(\text{bzq}) + \sigma(\text{Me})$                                             |
| HOMO-1   | -6.533 | 85               | 9   | 6  | -                                                    | $\text{d}z^2(\text{Pt})$                                                                                |
| HOMO     | -5.374 | 26               | 72  | -  | 2                                                    | $\pi(\text{bzq}) + \text{d}(\text{Pt})$                                                                 |
| LUMO     | -1.598 | 4                | 96  | -  | -                                                    | $\pi^*(\text{bzq})$ most around N atom                                                                  |
| LUMO+1   | -1.112 | 4                | 56  | -  | 40                                                   | $\pi^*(\text{bzq}) + \pi^*(\text{P}(\text{Ph})_2(\text{C}_3\text{H}_5))$                                |
| LUMO+2   | -0.981 | 2                | 29  | -  | 68                                                   | $\pi^*(\text{P}(\text{Ph})_2(\text{C}_3\text{H}_5)) + \pi^*(\text{bzq})$                                |
| LUMO+3   | -0.861 | 1                | 5   | 1  | 93                                                   | $\pi^*(\text{P}(\text{Ph})_2(\text{C}_3\text{H}_5))$                                                    |
| LUMO+4   | -0.663 | -                | 7   | -  | 93                                                   | $\pi^*(\text{P}(\text{Ph})_2(\text{C}_3\text{H}_5))$                                                    |
| LUMO+5   | -0.368 | 2                | -   | -  | 98                                                   | $\pi^*(\text{P}(\text{Ph})_2(\text{C}_3\text{H}_5))$                                                    |
| LUMO+6   | -0.123 | 7                | 72  | 3  | 18                                                   | $\pi^*(\text{bzq}) + \pi^*(\text{P}(\text{Ph})_2(\text{C}_3\text{H}_5))$                                |
| LUMO+7   | -0.021 | 11               | 8   | -  | 81                                                   | $\pi^*(\text{P}(\text{Ph})_2(\text{C}_3\text{H}_5)) + \pi^*(\text{bzq})$                                |

1b

| Orbitals | E (eV) | Contribution (%) |     |    |                     | Orbital interpretation (from high affect to minimum)                                      |
|----------|--------|------------------|-----|----|---------------------|-------------------------------------------------------------------------------------------|
|          |        | Pt               | bzq | Me | S-(Me) <sub>2</sub> |                                                                                           |
| HOMO-9   | -8.134 | 1                | 98  | 1  | -                   | $\pi(\text{bzq})$                                                                         |
| HOMO-8   | -7.615 | 19               | 79  | 1  | 1                   | $\pi(\text{bzq}) + \text{d}(\text{Pt})$                                                   |
| HOMO-7   | -7.138 | 16               | 38  | 30 | 16                  | $\pi(\text{bzq}) + \sigma(\text{Me}) + \text{d}(\text{Pt}) + \sigma(\text{S-Me}_2)$       |
| HOMO-6   | -6.786 | 16               | 30  | 13 | 41                  | $\pi(\text{bzq}) + \text{d}(\text{Pt}) + \sigma(\text{S-Me}_2) + \sigma(\text{Me})$       |
| HOMO-5   | -6.606 | 40               | 59  | -  | 1                   | $\pi(\text{bzq}) + \text{d}(\text{Pt})$                                                   |
| HOMO-4   | -6.298 | 76               | 6   | 8  | 10                  | $\text{d}(\text{Pt}) + \sigma(\text{S-Me}_2)$                                             |
| HOMO-3   | -6.277 | 16               | 83  | 1  | -                   | $\pi(\text{bzq}) + \text{d}(\text{Pt})$                                                   |
| HOMO-2   | -5.741 | 74               | 19  | 7  | -                   | $\text{d}(\text{Pt}) + \pi(\text{bzq})$                                                   |
| HOMO-1   | -5.527 | 91               | 5   | 4  | -                   | $\text{d}z^2(\text{Pt})$                                                                  |
| HOMO     | -5.387 | 28               | 70  | -  | 2                   | $\pi(\text{bzq}) + \text{d}(\text{Pt})$                                                   |
| LUMO     | -1.651 | 4                | 96  | -  | -                   | $\pi^*(\text{bzq})$                                                                       |
| LUMO+1   | -1.127 | 5                | 91  | -  | 4                   | $\pi^*(\text{bzq})$                                                                       |
| LUMO+2   | -1.166 | 11               | 80  | 1  | 8                   | $\pi^*(\text{bzq}) + \text{d}(\text{Pt})$                                                 |
| LUMO+3   | 0.345  | 14               | 36  | -  | 50                  | $\sigma^*(\text{S-Me}_2) + \pi^*(\text{bzq}) + \text{d}(\text{Pt})$                       |
| LUMO+4   | 0.826  | 38               | 29  | 12 | 21                  | $\text{d}(\text{Pt}) + \pi^*(\text{bzq}) + \sigma^*(\text{S-Me}_2) + \sigma^*(\text{Me})$ |
| LUMO+5   | 0.933  | 2                | 87  | -  | 11                  | $\pi^*(\text{bzq}) + \sigma^*(\text{S-Me}_2)$                                             |

2a

| Orbitals | E (eV) | Contribution (%) |     |        |                      | Orbital interpretation (from high affect to minimum)                                   |
|----------|--------|------------------|-----|--------|----------------------|----------------------------------------------------------------------------------------|
|          |        | Pt               | bzq | S-(Ph) | P-(Ph <sub>3</sub> ) |                                                                                        |
| HOMO-13  | -7.247 | 4                | 2   | -      | 94                   | $\pi(\text{P}(\text{Ph})_3)$                                                           |
| HOMO-10  | -6.976 | 47               | 15  | 18     | 20                   | $d(\text{Pt}) + \pi(\text{P}(\text{Ph})_3) + \pi(\text{S-Ph}) + \pi(\text{bzq})$       |
| HOMO-9   | -6.931 | 38               | 13  | 25     | 24                   | $d(\text{Pt}) + \pi(\text{S-Ph}) + \pi(\text{P}(\text{Ph})_3) + \pi(\text{bzq})$       |
| HOMO-8   | -6.867 | 7                | 4   | 2      | 87                   | $\pi(\text{P}(\text{Ph})_3)$                                                           |
| HOMO-7   | -6.822 | 38               | 46  | 9      | 7                    | $\pi(\text{bzq}) + d(\text{Pt})$                                                       |
| HOMO-6   | -6.651 | 3                | 3   | 30     | 64                   | $[\text{n}(\text{S}) + \pi(\text{Ph})] + \pi(\text{P}(\text{Ph})_3)$                   |
| HOMO-5   | -6.363 | 15               | 83  | -      | 2                    | $\pi(\text{bzq}) + d(\text{Pt})$                                                       |
| HOMO-4   | -6.259 | 14               | 1   | 81     | 4                    | $\pi(\text{Ph}) + dz^2(\text{Pt})$                                                     |
| HOMO-3   | -6.176 | 73               | 3   | 19     | 5                    | $dz^2(\text{Pt}) + \pi(\text{Ph})$                                                     |
| HOMO-2   | -5.915 | 8                | 34  | 55     | 3                    | $[\text{n}(\text{S}) + \pi(\text{Ph})] + \pi(\text{bzq})$                              |
| HOMO-1   | -5.662 | 21               | 62  | 17     | 1                    | $\pi(\text{bzq}) + d(\text{Pt}) + \text{n}(\text{S})$                                  |
| HOMO     | -4.564 | 6                | 3   | 89     | 2                    | $[\text{n}(\text{S}) + \pi(\text{Ph})]$                                                |
| LUMO     | -1.883 | 4                | 94  | -      | 2                    | $\pi^*(\text{bzq})$ most around N atom                                                 |
| LUMO+1   | -1.298 | 5                | 92  | -      | 3                    | $\pi^*(\text{bzq})$                                                                    |
| LUMO+2   | -1.091 | -                | 3   | -      | 97                   | $\pi^*(\text{P}(\text{Ph})_3)$                                                         |
| LUMO+3   | -0.919 | 15               | 6   | 5      | 74                   | $\pi^*(\text{P}(\text{Ph})_3) + d(\text{Pt})$                                          |
| LUMO+4   | -0.801 | 2                | 5   | 1      | 92                   | $\pi^*(\text{P}(\text{Ph})_3)$                                                         |
| LUMO+5   | -0.606 | 4                | 12  | 1      | 83                   | $\pi^*(\text{P}(\text{Ph})_3) + \pi^*(\text{bzq})$                                     |
| LUMO+6   | -0.485 | 4                | 13  | 1      | 82                   | $\pi^*(\text{P}(\text{Ph})_3) + \pi^*(\text{bzq})$                                     |
| LUMO+7   | -0.294 | 5                | 58  | 2      | 35                   | $\pi^*(\text{bzq}) + \pi^*(\text{P}(\text{Ph})_3)$                                     |
| LUMO+8   | -0.063 | 1                | 4   | 4      | 91                   | $\pi^*(\text{P}(\text{Ph})_3)$                                                         |
| LUMO+9   | 0.087  | 12               | 20  | 18     | 50                   | $\pi^*(\text{P}(\text{Ph})_3) + \pi^*(\text{bzq}) + \pi^*(\text{S-Ph}) + d(\text{Pt})$ |
| LUMO+10  | 0.396  | 8                | 28  | 47     | 17                   | $\pi^*(\text{S-Ph}) + \pi^*(\text{bzq}) + \pi^*(\text{P}(\text{Ph})_3)$                |

## 2b

| Orbitals | E (eV) | Contribution (%) |     |        |                      | Orbital interpretation (from high affect to minimum)                             |
|----------|--------|------------------|-----|--------|----------------------|----------------------------------------------------------------------------------|
|          |        | Pt               | bzq | S-(Py) | P-(Ph <sub>3</sub> ) |                                                                                  |
| HOMO-10  | -6.977 | 19               | 4   | 41     | 36                   | $\pi(\text{S-py}) + \pi(\text{P}(\text{Ph})_3) + d(\text{Pt})$                   |
| HOMO-9   | -6.839 | 45               | 12  | 14     | 29                   | $d(\text{Pt}) + \pi(\text{P}(\text{Ph})_3) + \pi(\text{S-py}) + \pi(\text{bzq})$ |
| HOMO-8   | -6.799 | 37               | 10  | 6      | 57                   | $\pi(\text{P}(\text{Ph})_3) + d(\text{Pt})$                                      |
| HOMO-7   | -6.748 | 37               | 49  | 5      | 9                    | $\pi(\text{bzq}) + d(\text{Pt})$                                                 |
| HOMO-6   | -6.684 | 7                | 4   | 16     | 73                   | $\pi(\text{P}(\text{Ph})_3) + \pi(\text{S-py})$                                  |
| HOMO-5   | -6.552 | 17               | 3   | 64     | 16                   | $\pi(\text{S-py}) + d(\text{Pt}) + \pi(\text{P}(\text{Ph})_3)$                   |
| HOMO-4   | -6.280 | 18               | 76  | 2      | 4                    | $\pi(\text{bzq}) + d(\text{Pt})$                                                 |
| HOMO-3   | -6.058 | 8                | 32  | 57     | 3                    | $\pi(\text{S-py}) + \pi(\text{bzq})$                                             |
| HOMO-2   | -5.873 | 67               | 3   | 25     | 5                    | $d(\text{Pt}) + \pi(\text{S-py})$                                                |
| HOMO-1   | -5.584 | 26               | 65  | 8      | 1                    | $\pi(\text{bzq}) + d(\text{Pt})$                                                 |
| HOMO     | -4.847 | 8                | 6   | 83     | 3                    | $[\text{n}(\text{S}) + \pi(\text{py})]$                                          |
| LUMO     | -1.582 | 3                | 91  | 1      | 5                    | $\pi^*(\text{bzq})$                                                              |
| LUMO+1   | -1.221 | 4                | 91  | 1      | 4                    | $\pi^*(\text{bzq})$                                                              |
| LUMO+2   | -0.995 | 3                | 6   | 1      | 90                   | $\pi^*(\text{P}(\text{Ph})_3)$                                                   |
| LUMO+3   | -0.819 | 16               | 14  | 4      | 66                   | $\pi^*(\text{P}(\text{Ph})_3) + d(\text{Pt}) + \pi^*(\text{bzq})$                |
| LUMO+4   | -0.676 | 1                | 4   | 2      | 93                   | $\pi^*(\text{P}(\text{Ph})_3)$                                                   |
| LUMO+5   | -0.559 | 4                | 13  | 2      | 81                   | $\pi^*(\text{P}(\text{Ph})_3) + \pi^*(\text{bzq})$                               |

|         |        |   |    |    |    |                                                                         |
|---------|--------|---|----|----|----|-------------------------------------------------------------------------|
| LUMO+6  | -0.386 | 4 | 19 | 3  | 74 | $\pi^*(\text{P}(\text{Ph})_3) + \pi^*(\text{bzq})$                      |
| LUMO+7  | -0.192 | 4 | 45 | 14 | 37 | $\pi^*(\text{bzq}) + \pi^*(\text{P}(\text{Ph})_3) + \pi^*(\text{S-py})$ |
| LUMO+8  | -0.131 | 3 | 14 | 73 | 10 | $\pi^*(\text{S-py}) + \pi^*(\text{bzq}) + \pi^*(\text{P}(\text{Ph})_3)$ |
| LUMO+9  | -0.037 | 1 | 5  | 8  | 86 | $\pi^*(\text{P}(\text{Ph})_3)$                                          |
| LUMO+10 | 0.196  | 8 | 16 | 39 | 37 | $\pi^*(\text{S-py}) + \pi^*(\text{P}(\text{Ph})_3) + \pi^*(\text{bzq})$ |

### 3a

| Orbitals | E (eV) | Contribution (%) |     |                                           |                      | Orbital interpretation (from high affect to minimum)                                                  |
|----------|--------|------------------|-----|-------------------------------------------|----------------------|-------------------------------------------------------------------------------------------------------|
|          |        | Pt               | bzq | <i>p</i> -MeC <sub>6</sub> H <sub>4</sub> | S-(Me <sub>2</sub> ) |                                                                                                       |
| HOMO-10  | -7.732 | 22               | 76  | 1                                         | 1                    | $\pi(\text{bzq}) + \text{d}(\text{Pt})$                                                               |
| HOMO-9   | -7.312 | 24               | 34  | 24                                        | 18                   | $\pi(\text{bzq}) + \text{d}(\text{Pt}) + \pi(p\text{-MeC}_6\text{H}_4) + \sigma(\text{S-Me}_2)$       |
| HOMO-8   | -7.251 | 33               | 23  | 41                                        | 3                    | $\pi(p\text{-MeC}_6\text{H}_4) + \text{d}(\text{Pt}) + \pi(\text{bzq})$                               |
| HOMO-7   | -6.761 | 20               | 23  | 7                                         | 50                   | $\sigma(\text{S-Me}_2) + \pi(\text{bzq}) + \text{d}(\text{Pt})$                                       |
| HOMO-6   | -6.728 | 40               | 53  | 2                                         | 6                    | $\pi(\text{bzq}) + \text{d}(\text{Pt})$                                                               |
| HOMO-5   | -6.398 | 30               | 65  | 5                                         | -                    | $\pi(\text{bzq}) + \text{d}(\text{Pt})$                                                               |
| HOMO-4   | -6.188 | 9                | 1   | 87                                        | 3                    | $\pi(p\text{-MeC}_6\text{H}_4)$                                                                       |
| HOMO-3   | -6.044 | 55               | 36  | 8                                         | 1                    | $\text{d}(\text{Pt}) + \pi(\text{bzq})$                                                               |
| HOMO-2   | -5.643 | 85               | 6   | 8                                         | 1                    | $\text{d}(\text{Pt})$                                                                                 |
| HOMO-1   | -5.480 | 28               | 70  | -                                         | 2                    | $\pi(\text{bzq}) + \text{d}(\text{Pt})$                                                               |
| HOMO     | -5.404 | 24               | 5   | 67                                        | 4                    | $\pi(p\text{-MeC}_6\text{H}_4) + \text{d}(\text{Pt})$                                                 |
| LUMO     | -1.758 | 4                | 94  | 2                                         | 0                    | $\pi^*(\text{bzq})$                                                                                   |
| LUMO+1   | -1.205 | 4                | 87  | 1                                         | 8                    | $\pi^*(\text{bzq})$                                                                                   |
| LUMO+2   | -0.232 | 8                | 72  | 5                                         | 15                   | $\pi^*(\text{bzq}) + \sigma^*(\text{S-Me}_2)$                                                         |
| LUMO+3   | 0.297  | 6                | 21  | 2                                         | 71                   | $\sigma^*(\text{S-Me}_2) + \pi^*(\text{bzq})$                                                         |
| LUMO+4   | 0.412  | 4                | 7   | 82                                        | 7                    | $\pi^*(p\text{-MeC}_6\text{H}_4)$                                                                     |
| LUMO+5   | 0.532  | 21               | 15  | 47                                        | 17                   | $\pi^*(p\text{-MeC}_6\text{H}_4) + \text{d}(\text{Pt}) + \sigma^*(\text{S-Me}_2) + \pi^*(\text{bzq})$ |
| LUMO+6   | 0.736  | 15               | 35  | 27                                        | 23                   | $\pi^*(\text{bzq}) + \pi^*(p\text{-MeC}_6\text{H}_4) + \sigma^*(\text{S-Me}_2) + \text{d}(\text{Pt})$ |
| LUMO+7   | 0.899  | 02               | 62  | 4                                         | 32                   | $\pi^*(\text{bzq}) + \sigma^*(\text{S-Me}_2)$                                                         |

### 3b

| Orbitals | E (eV) | Contribution (%) |     |                                           |                          | Orbital interpretation (from high affect to minimum)                            |
|----------|--------|------------------|-----|-------------------------------------------|--------------------------|---------------------------------------------------------------------------------|
|          |        | Pt               | bzq | <i>p</i> -MeC <sub>6</sub> H <sub>4</sub> | P-(Ph) <sub>2</sub> (Me) |                                                                                 |
| HOMO-13  | -7.528 | 9                | 28  | 4                                         | 59                       | $\pi(\text{P}(\text{Ph})_2(\text{Me})) + \pi(\text{bzq})$                       |
| HOMO-12  | -7.376 | 3                | 3   | 2                                         | 92                       | $\pi(\text{P}(\text{Ph})_2(\text{Me}))$                                         |
| HOMO-8   | -7.086 | 20               | 30  | 35                                        | 15                       | $\pi(p\text{-MeC}_6\text{H}_4) + \pi(\text{bzq}) + \text{d}(\text{Pt}) +$       |
| HOMO-7   | -6.645 | 45               | 50  | 1                                         | 4                        | $\pi(\text{bzq}) + \text{d}(\text{Pt})$                                         |
| HOMO-6   | -6.531 | 16               | 30  | 2                                         | 52                       | $\pi(\text{P}(\text{Ph})_2(\text{Me})) + \pi(\text{bzq}) + \text{d}(\text{Pt})$ |
| HOMO-5   | -6.315 | 26               | 69  | 5                                         | 1                        | $\pi(\text{bzq}) + \text{d}(\text{Pt})$                                         |
| HOMO-4   | -6.076 | 15               | 2   | 82                                        | 1                        | $\pi(p\text{-MeC}_6\text{H}_4) + \text{d}(\text{Pt})$                           |
| HOMO-3   | -5.994 | 53               | 32  | 14                                        | 1                        | $\text{d}(\text{Pt}) + \pi(\text{bzq}) + \pi(p\text{-MeC}_6\text{H}_4)$         |
| HOMO-2   | -5.532 | 82               | 7   | 9                                         | 2                        | $\text{d}(\text{Pt})$                                                           |
| HOMO-1   | -5.439 | 28               | 68  | -                                         | 4                        | $\pi(\text{bzq}) + \text{d}(\text{Pt})$                                         |
| HOMO     | -5.300 | 22               | 6   | 64                                        | 8                        | $\pi(p\text{-MeC}_6\text{H}_4) + \text{d}(\text{Pt})$                           |
| LUMO     | -1.583 | 4                | 93  | 2                                         | 1                        | $\pi^*(\text{bzq})$                                                             |

|         |        |    |    |    |    |                                                                                                        |
|---------|--------|----|----|----|----|--------------------------------------------------------------------------------------------------------|
| LUMO+1  | -1.026 | 3  | 86 | 1  | 10 | $\pi^*(\text{bzq})$                                                                                    |
| LUMO+2  | -0.994 | 3  | 4  | 1  | 92 | $\pi^*(\text{P(Ph)}_2(\text{Me}))$                                                                     |
| LUMO+3  | -0.774 | 4  | 6  | 1  | 89 | $\pi^*(\text{P(Ph)}_2(\text{Me}))$                                                                     |
| LUMO+4  | -0.637 | 4  | 7  | -  | 89 | $\pi^*(\text{P(Ph)}_2(\text{Me}))$                                                                     |
| LUMO+5  | -0.431 | 2  | 5  | 1  | 92 | $\pi^*(\text{P(Ph)}_2(\text{Me}))$                                                                     |
| LUMO+6  | -0.084 | 8  | 73 | 5  | 14 | $\pi^*(\text{bzq})$                                                                                    |
| LUMO+10 | 0.895  | 12 | 23 | 53 | 12 | $\pi^*(p\text{-MeC}_6\text{H}_4) + \pi^*(\text{bzq}) + (\text{Pt}) + \pi^*(\text{P(Ph)}_2(\text{Me}))$ |

### 3c

| Orbitals | E (eV) | Contribution (%) |     |                                           |                           | Orbital interpretation (from high affect to minimum)                                              |
|----------|--------|------------------|-----|-------------------------------------------|---------------------------|---------------------------------------------------------------------------------------------------|
|          |        | Pt               | bzq | <i>p</i> -MeC <sub>6</sub> H <sub>4</sub> | P-(Ph) (Me <sub>2</sub> ) |                                                                                                   |
| HOMO-11  | -7.458 | 5                | 19  | 7                                         | 69                        | $\pi(\text{P(Ph)}_2(\text{Me})) + \pi(\text{bzq})$                                                |
| HOMO-10  | -7.371 | 4                | 4   | 2                                         | 90                        | $\pi(\text{P(Ph)}_2(\text{Me}))$                                                                  |
| HOMO-9   | -7.281 | 49               | 13  | 30                                        | 8                         | $d(\text{Pt}) + \pi(p\text{-MeC}_6\text{H}_4) + \pi(\text{bzq})$                                  |
| HOMO-8   | -7.118 | 20               | 30  | 36                                        | 14                        | $\pi(p\text{-MeC}_6\text{H}_4) + \pi(\text{bzq}) + d(\text{Pt}) + \pi(\text{P(Ph)}_2(\text{Me}))$ |
| HOMO-7   | -6.663 | 44               | 49  | 2                                         | 5                         | $\pi(\text{bzq}) + d(\text{Pt})$                                                                  |
| HOMO-6   | -6.610 | 18               | 35  | 2                                         | 44                        | $\pi(\text{P(Ph)}_2(\text{Me})) + \pi(\text{bzq}) + d(\text{Pt})$                                 |
| HOMO-5   | -6.329 | 25               | 70  | 5                                         | -                         | $\pi(\text{bzq}) + d(\text{Pt})$                                                                  |
| HOMO-4   | -6.100 | 13               | 2   | 84                                        | 1                         | $\pi(p\text{-MeC}_6\text{H}_4) + d(\text{Pt})$                                                    |
| HOMO-3   | -5.997 | 57               | 32  | 11                                        | -                         | $d(\text{Pt}) + \pi(\text{bzq}) + \pi(p\text{-MeC}_6\text{H}_4)$                                  |
| HOMO-2   | -5.544 | 82               | 6   | 9                                         | 2                         | $d(\text{Pt})$                                                                                    |
| HOMO-1   | -5.449 | 28               | 69  | -                                         | 3                         | $\pi(\text{bzq}) + d(\text{Pt})$                                                                  |
| HOMO     | -5.319 | 22               | 6   | 64                                        | 8                         | $\pi(p\text{-MeC}_6\text{H}_4) + d(\text{Pt})$                                                    |
| LUMO     | -1.610 | 3                | 93  | 2                                         | 2                         | $\pi^*(\text{bzq})$                                                                               |
| LUMO+1   | -1.042 | 3                | 86  | 2                                         | 9                         | $\pi^*(\text{bzq})$                                                                               |
| LUMO+2   | -0.921 | 2                | 8   | -                                         | 90                        | $\pi^*(\text{P(Ph)}_2(\text{Me}))$                                                                |
| LUMO+3   | -0.616 | 5                | 5   | 1                                         | 89                        | $\pi^*(\text{P(Ph)}_2(\text{Me}))$                                                                |
| LUMO+4   | -0.125 | 9                | 74  | 5                                         | 12                        | $\pi^*(\text{bzq}) + \pi^*(\text{P(Ph)}_2(\text{Me}))$                                            |
| LUMO+5   | 0.551  | 6                | 25  | 30                                        | 39                        | $\pi^*(\text{P(Ph)}_2(\text{Me})) + \pi^*(p\text{-MeC}_6\text{H}_4) + \pi^*(\text{bzq})$          |
| LUMO+6   | 0.587  | 9                | 24  | 48                                        | 19                        | $\pi^*(p\text{-MeC}_6\text{H}_4) + \pi^*(\text{P(Ph)}_2(\text{Me})) + \pi^*(\text{bzq})$          |
| LUMO+7   | 0.712  | 13               | 27  | 17                                        | 43                        | $\pi^*(\text{P(Ph)}_2(\text{Me})) + \pi^*(\text{bzq}) + \pi^*(p\text{-MeC}_6\text{H}_4) +$        |
| LUMO+8   | 0.857  | 8                | 16  | 63                                        | 13                        | $\pi^*(p\text{-MeC}_6\text{H}_4) + \pi^*(\text{bzq}) + \pi^*(\text{P(Ph)}_2(\text{Me}))$          |

### 4a

| Orbitals | E (eV) | Contribution (%) |     |    |                      | Orbital interpretation (from high affect to minimum)     |
|----------|--------|------------------|-----|----|----------------------|----------------------------------------------------------|
|          |        | Pt               | bzq | Ph | S-(Me <sub>2</sub> ) |                                                          |
| HOMO-10  | -7.746 | 20               | 79  | -  | 1                    | $\pi(\text{bzq}) + d(\text{Pt})$                         |
| HOMO-7   | -6.760 | 17               | 22  | 6  | 55                   | $\sigma(\text{S-Me}_2) + \pi(\text{bzq}) + d(\text{Pt})$ |
| HOMO-6   | -6.741 | 41               | 56  | 2  | 1                    | $\pi(\text{bzq}) + d(\text{Pt})$                         |
| HOMO-5   | -6.409 | 22               | 72  | 6  | -                    | $\pi(\text{bzq}) + d(\text{Pt})$                         |
| HOMO-4   | -6.224 | 8                | 3   | 87 | 2                    | $\pi(\text{Ph})$                                         |
| HOMO-3   | -6.064 | 65               | 28  | 7  | -                    | $d(\text{Pt}) + \pi(\text{bzq})$                         |
| HOMO-2   | -5.613 | 76               | 4   | 19 | 1                    | $d(\text{Pt}) + \pi(\text{Ph})$                          |
| HOMO-1   | -5.576 | 44               | 6   | 45 | 5                    | $\pi(\text{Ph}) + d(\text{Pt})$                          |

|         |        |    |    |    |    |                                                                                 |
|---------|--------|----|----|----|----|---------------------------------------------------------------------------------|
| HOMO    | -5.514 | 31 | 66 | -  | 2  | $\pi(\text{bzq}) + \text{d(Pt)}$                                                |
| LUMO    | -1.657 | 3  | 95 | 2  | -  | $\pi^*(\text{bzq})$                                                             |
| LUMO+1  | -1.127 | 3  | 89 | 1  | 7  | $\pi^*(\text{bzq})$                                                             |
| LUMO+2  | -0.183 | 8  | 72 | 5  | 15 | $\pi^*(\text{bzq}) + \sigma^*(\text{S-Me}_2)$                                   |
| LUMO+3  | 0.370  | 7  | 23 | 1  | 69 | $\sigma^*(\text{S-Me}_2) + \pi^*(\text{bzq})$                                   |
| LUMO+4  | 0.430  | 28 | 26 | 26 | 20 | $\text{d(Pt)} + \pi^*(\text{bzq}) + \pi^*(\text{Ph}) + \sigma^*(\text{S-Me}_2)$ |
| LUMO+5  | 0.509  | 2  | 8  | 86 | 4  | $\pi^*(\text{Ph})$                                                              |
| LUMO+6  | 0.743  | 13 | 27 | 41 | 19 | $\pi^*(\text{Ph}) + \pi^*(\text{bzq}) + \sigma^*(\text{S-Me}_2) + \text{d(Pt)}$ |
| LUMO+7  | 0.948  | 2  | 57 | 4  | 37 | $\pi^*(\text{bzq}) + \sigma^*(\text{S-Me}_2)$                                   |
| HOMO-10 | -7.746 | 20 | 79 | -  | 1  | $\pi(\text{bzq}) + \text{d(Pt)}$                                                |



**Table S3.** The vertical electronic transition energies of seven considered complexes:

*1b*

| State                  | Major contribution (%)                                                                                   | E (eV) | <i>f</i> | $\lambda_{\text{cal}}$ (nm) | Assignment                                              |
|------------------------|----------------------------------------------------------------------------------------------------------|--------|----------|-----------------------------|---------------------------------------------------------|
| <i>S</i> <sub>3</sub>  | <i>H</i> -2 → <i>L</i> (66.9%)                                                                           | 3.592  | 0.0817   | 345.2                       | <sup>1</sup> MLCT/ <sup>1</sup> ILCT                    |
| <i>S</i> <sub>7</sub>  | <i>H</i> → <i>L</i> +1 (81.1%)                                                                           | 3.916  | 0.0259   | 316.6                       | <sup>1</sup> ILCT/ <sup>1</sup> MLCT                    |
| <i>S</i> <sub>8</sub>  | <i>H</i> -4 → <i>L</i> (76.5%)                                                                           | 4.170  | 0.0419   | 297.4                       | <sup>1</sup> MLCT/ <sup>1</sup> LLCT                    |
| <i>S</i> <sub>9</sub>  | <i>H</i> -4 → <i>L</i> +1 (44.4%)                                                                        | 4.335  | 0.0953   | 286                         | <sup>1</sup> MLCT/ <sup>1</sup> LLCT                    |
| <i>S</i> <sub>12</sub> | <i>H</i> → <i>L</i> +2 (36.8%)<br><i>H</i> -5 → <i>L</i> (35.5%)<br><i>H</i> -2 → <i>L</i> +2 (11.1%)    | 4.554  | 0.0500   | 272.3                       | <sup>1</sup> ILCT/ <sup>1</sup> MLCT                    |
| <i>S</i> <sub>14</sub> | <i>H</i> -2 → <i>L</i> +2 (96.8%)                                                                        | 4.783  | 0.0287   | 259.2                       | <sup>1</sup> MLCT                                       |
| <i>S</i> <sub>16</sub> | <i>H</i> -2 → <i>L</i> +2 (50.4%)<br><i>H</i> -5 → <i>L</i> +1 (21.8%)<br><i>H</i> → <i>L</i> +2 (14.1%) | 4.867  | 0.0233   | 254.8                       | <sup>1</sup> MLCT/ <sup>1</sup> ILCT                    |
| <i>S</i> <sub>17</sub> | <i>H</i> -5 → <i>L</i> +1 (38.3%)<br><i>H</i> -2 → <i>L</i> +2 (21.5%)                                   | 4.980  | 0.1454   | 249                         | <sup>1</sup> MLCT/ <sup>1</sup> ILCT                    |
| <i>S</i> <sub>18</sub> | <i>H</i> -1 → <i>L</i> +4 (35.4%)<br><i>H</i> -4 → <i>L</i> +1 (11.2%)                                   | 5.097  | 0.5035   | 243.3                       | <sup>1</sup> MLCT                                       |
| <i>S</i> <sub>24</sub> | <i>H</i> → <i>L</i> +3 (70.9%)                                                                           | 5.296  | 0.0765   | 234.1                       | <sup>1</sup> LLCT/ <sup>1</sup> MLCT                    |
| <i>S</i> <sub>25</sub> | <i>H</i> -1 → <i>L</i> +3 (90.3%)                                                                        | 5.384  | 0.0678   | 230.3                       | <sup>1</sup> MLCT                                       |
| <i>S</i> <sub>26</sub> | <i>H</i> -8 → <i>L</i> (30.3%)<br><i>H</i> -2 → <i>L</i> +3 (26.9%)<br><i>H</i> -3 → <i>L</i> +4 (11.8%) | 5.412  | 0.1103   | 229.1                       | <sup>1</sup> ILCT/ <sup>1</sup> MLCT                    |
| <i>S</i> <sub>27</sub> | <i>H</i> -3 → <i>L</i> +4 (65.5%)<br><i>H</i> -2 → <i>L</i> +3 (17.1%)                                   | 5.443  | 0.0383   | 227.8                       | <sup>1</sup> LMCT/ <sup>1</sup> LLCT                    |
| <i>S</i> <sub>28</sub> | <i>H</i> -2 → <i>L</i> +3 (44.2%)<br><i>H</i> -8 → <i>L</i> (22.1%)                                      | 5.454  | 0.1450   | 227.3                       | <sup>1</sup> MLCT/ <sup>1</sup> LLCT                    |
| <i>S</i> <sub>29</sub> | <i>H</i> -8 → <i>L</i> +1 (29.2%)<br><i>H</i> → <i>L</i> +5 (35.5%)<br><i>H</i> -4 → <i>L</i> +2 (19.2%) | 5.676  | 0.0535   | 218.4                       | <sup>1</sup> MLCT/ <sup>1</sup> LLCT                    |
| <i>S</i> <sub>31</sub> | <i>H</i> -5 → <i>L</i> +2 (47.9%)<br><i>H</i> → <i>L</i> +5 (31.6%)                                      | 5.814  | 0.1523   | 213.2                       | <sup>1</sup> MLCT/ <sup>1</sup> LLCT                    |
| <i>S</i> <sub>37</sub> | <i>H</i> -4 → <i>L</i> +2 (23.7%)<br><i>H</i> -9 → <i>L</i> +1 (35.5%)<br><i>H</i> → <i>L</i> +5 (12.7%) | 6.075  | 0.4203   | 204.1                       | <sup>1</sup> MLCT/ <sup>1</sup> LLCT/ <sup>1</sup> ILCT |
| <i>S</i> <sub>44</sub> | <i>H</i> -4 → <i>L</i> +3 (34.1%)                                                                        | 6.364  | 0.4919   | 194.8                       | <sup>1</sup> MLCT/ <sup>1</sup> LLCT                    |

*2a*

| State                  | Major contribution (%)                                                 | E (eV) | <i>f</i> | $\lambda_{\text{cal}}$ (nm) | Assignment                           |
|------------------------|------------------------------------------------------------------------|--------|----------|-----------------------------|--------------------------------------|
| <i>S</i> <sub>4</sub>  | <i>H</i> -1 → <i>L</i> (93.1%)                                         | 3.261  | 0.075    | 380.2                       | <sup>1</sup> MLCT/ <sup>1</sup> LLCT |
| <i>S</i> <sub>10</sub> | <i>H</i> -1 → <i>L</i> +1 (47.1%)<br><i>H</i> -4 → <i>L</i> (44.3%)    | 3.831  | 0.032    | 323.6                       | <sup>1</sup> MLCT/ <sup>1</sup> LLCT |
| <i>S</i> <sub>12</sub> | <i>H</i> -1 → <i>L</i> +3 (36.8%)<br><i>H</i> -1 → <i>L</i> +2 (22.7%) | 4.026  | 0.023    | 308                         | <sup>1</sup> MLCT/ <sup>1</sup> LLCT |

|          |                                                                                                 |       |       |       |                                                   |
|----------|-------------------------------------------------------------------------------------------------|-------|-------|-------|---------------------------------------------------|
| $S_{13}$ | $H \rightarrow L+7$ (47.7%)<br>$H \rightarrow L+9$ (12.0%)                                      | 4.035 | 0.103 | 307.3 | ${}^1\text{LLCT}$                                 |
| $S_{14}$ | $H-1 \rightarrow L+1$ (22.3%)                                                                   | 4.088 | 0.100 | 303.3 | ${}^1\text{MLCT}/{}^1\text{LLCT}$                 |
| $S_{15}$ | $H \rightarrow L+8$ (59.0%)<br>$H \rightarrow L+7$ (24.2%)                                      | 4.166 | 0.033 | 297.6 | ${}^1\text{LLCT}$                                 |
| $S_{16}$ | $H-2 \rightarrow L+1$ (50.6%)<br>$H-3 \rightarrow L+1$ (15.3%)                                  | 4.172 | 0.023 | 297.2 | ${}^1\text{LLCT}/{}^1\text{MLCT}$                 |
| $S_{18}$ | $H-1 \rightarrow L+2$ (36.9%)<br>$H-1 \rightarrow L+3$ (22.8%)                                  | 4.208 | 0.029 | 294.6 | ${}^1\text{LLCT}/{}^1\text{MLCT}$                 |
| $S_{19}$ | $H-3 \rightarrow L+3$ (37.6%)<br>$H-3 \rightarrow L+2$ (13.5%)                                  | 4.225 | 0.060 | 293.5 | ${}^1\text{MLCT}/{}^1\text{LLCT}$                 |
| $S_{21}$ | $H-3 \rightarrow L+1$ (25.0%)<br>$H \rightarrow L+10$ (23.2%)<br>$H-2 \rightarrow L+1$ (12.8%)  | 4.268 | 0.080 | 290.5 | ${}^1\text{MLCT}/{}^1\text{LLCT}$                 |
| $S_{24}$ | $H-9 \rightarrow L$ (60.2%)                                                                     | 4.417 | 0.073 | 280.7 | ${}^1\text{MLCT}/{}^1\text{LLCT}$                 |
| $S_{26}$ | $H-1 \rightarrow L+4$ (44.4%)<br>$H-2 \rightarrow L+2$ (12.5%)<br>$H-7 \rightarrow L$ (12.4%)   | 4.459 | 0.027 | 278.0 | ${}^1\text{LLCT}/{}^1\text{MLCT}$                 |
| $S_{27}$ | $H-1 \rightarrow L+4$ (29.2%)<br>$H-2 \rightarrow L+2$ (25.8%)<br>$H-2 \rightarrow L+3$ (20.0%) | 4.489 | 0.135 | 276.2 | ${}^1\text{LLCT}/{}^1\text{MLCT}/{}^1\text{LMCT}$ |
| $S_{29}$ | $H-1 \rightarrow L+5$ (25.7%)<br>$H-2 \rightarrow L+3$ (11.2%)<br>$H-7 \rightarrow L$ (11.1%)   | 4.591 | 0.088 | 270.1 | ${}^1\text{MLCT}/{}^1\text{LLCT}$                 |
| $S_{30}$ | $H-3 \rightarrow L+2$ (50.9%)<br>$H-3 \rightarrow L+3$ (17.8%)<br>$H-2 \rightarrow L+2$ (16.0%) | 4.623 | 0.035 | 268.2 | ${}^1\text{MLCT}/{}^1\text{LLCT}$                 |
| $S_{33}$ | $H-1 \rightarrow L+5$ (19.9%)<br>$H-8 \rightarrow L$ (12.9%)                                    | 4.683 | 0.054 | 264.8 | ${}^1\text{MLCT}/{}^1\text{LLCT}$                 |
| $S_{35}$ | $H-13 \rightarrow L$ (29.9%)<br>$H-1 \rightarrow L+5$ (14.7%)                                   | 4.720 | 0.039 | 262.7 | ${}^1\text{LLCT}/{}^1\text{MLCT}$                 |
| $S_{36}$ | $H-10 \rightarrow L$ (31.8%)<br>$H-1 \rightarrow L+5$ (15.3%)<br>$H-4 \rightarrow L+3$ (14.2%)  | 4.756 | 0.051 | 260.7 | ${}^1\text{MLCT}/{}^1\text{LLCT}$                 |
| $S_{37}$ | $H-1 \rightarrow L+6$ (26.5%)<br>$H \rightarrow L+11$ (18.6%)<br>$H \rightarrow L+12$ (13.5%)   | 4.780 | 0.057 | 259.4 | ${}^1\text{LLCT}/{}^1\text{MLCT}$                 |
| $S_{39}$ | $H-2 \rightarrow L+4$ (46.9%)<br>$H-3 \rightarrow L+4$ (14.8%)<br>$H \rightarrow L+11$ (11.5%)  | 4.829 | 0.024 | 256.8 | ${}^1\text{LLCT}/{}^1\text{MLCT}$                 |
| $S_{40}$ | $H-1 \rightarrow L+6$ (20.5%)<br>$H-7 \rightarrow L+1$ (18.9%)<br>$H-11 \rightarrow L$ (15.2%)  | 4.840 | 0.054 | 256.2 | ${}^1\text{LLCT}/{}^1\text{MLCT}$                 |
| $S_{43}$ | $H-3 \rightarrow L+4$ (61.3%)                                                                   | 4.884 | 0.044 | 253.8 | ${}^1\text{MLCT}/{}^1\text{LLCT}$                 |
| $S_{44}$ | $H-4 \rightarrow L+2$ (45.7%)<br>$H-1 \rightarrow L+5$ (19.3%)                                  | 4.893 | 0.027 | 253.4 | ${}^1\text{LLCT}/{}^1\text{MLCT}$                 |

## 2b

| State    | Major contribution (%)                                                                       | E (eV) | $f$   | $\lambda_{\text{cal}}$ (nm) | Assignment                                  |
|----------|----------------------------------------------------------------------------------------------|--------|-------|-----------------------------|---------------------------------------------|
| $S_3$    | $H-1 \rightarrow L$ (87.5%)                                                                  | 3.131  | 0.033 | 396                         | $^1\text{ILCT}/^1\text{MLCT}$               |
| $S_{10}$ | $H-1 \rightarrow L+1$ (57.9%)<br>$H-4 \rightarrow L$ (31.9%)                                 | 3.736  | 0.021 | 331.9                       | $^1\text{ILCT}/^1\text{MLCT}$               |
| $S_{13}$ | $H \rightarrow L+7$ (38.8%)<br>$H \rightarrow L+8$ (38.3%)                                   | 3.950  | 0.028 | 313.9                       | $^1\text{LLCT}$                             |
| $S_{14}$ | $H-1 \rightarrow L+3$ (39.7%)<br>$H-2 \rightarrow L+3$ (13.7%)                               | 3.970  | 0.039 | 312.3                       | $^1\text{LLCT}/^1\text{MLCT}$               |
| $S_{15}$ | $H-2 \rightarrow L+3$ (29.2%)                                                                | 3.985  | 0.042 | 311.1                       | $^1\text{MLCT}/^1\text{ILCT}$               |
| $S_{16}$ | $H-1 \rightarrow L+2$ (39.6%)<br>$H-2 \rightarrow L+3$ (16.6%)                               | 4.010  | 0.030 | 309.2                       | $^1\text{LLCT}/^1\text{MLCT}$               |
| $S_{19}$ | $H \rightarrow L+9$ (69.5%)                                                                  | 4.090  | 0.032 | 303.2                       | $^1\text{LLCT}$                             |
| $S_{23}$ | $H-4 \rightarrow L+1$ (28.7%)<br>$H-7 \rightarrow L$ (20.3%)                                 | 4.190  | 0.092 | 295.9                       | $^1\text{ILCT}/^1\text{MLCT}/^1\text{LLCT}$ |
| $S_{25}$ | $H-8 \rightarrow L$ (64.6%)<br>$H-9 \rightarrow L$ (12.3%)                                   | 4.261  | 0.077 | 291                         | $^1\text{MLCT}/^1\text{LLCT}$               |
| $S_{31}$ | $H-10 \rightarrow L$ (23.6%)<br>$H-3 \rightarrow L+3$ (20.5%)<br>$H-9 \rightarrow L$ (14.4%) | 4.518  | 0.056 | 274.4                       | $^1\text{LLCT}/^1\text{MLCT}/^1\text{LMCT}$ |
| $S_{32}$ | $H-3 \rightarrow L+3$ (29.4%)                                                                | 4.535  | 0.068 | 273.4                       | $^1\text{LLCT}/^1\text{LMCT}/^1\text{MCT}$  |
| $S_{33}$ | $H-1 \rightarrow L+3$ (22.2%)<br>$H-7 \rightarrow L$ (12.8%)                                 | 4.577  | 0.087 | 270.9                       | $^1\text{LLCT}/^1\text{MLCT}$               |
| $S_{36}$ | $H-1 \rightarrow L+3$ (21.1%)<br>$H-5 \rightarrow L+1$ (12.6%)                               | 4.662  | 0.104 | 266                         | $^1\text{LLCT}/^1\text{MLCT}$               |
| $S_{46}$ | $H-2 \rightarrow L+3$ (13.9%)<br>$H \rightarrow L+10$ (13.6%)                                | 4.818  | 0.093 | 257.3                       | $^1\text{MLCT}/^1\text{LLCT}$               |

## 3a

| State    | Major contribution (%)                                         | E (eV) | $f$   | $\lambda_{\text{cal}}$ (nm) | Assignment                                  |
|----------|----------------------------------------------------------------|--------|-------|-----------------------------|---------------------------------------------|
| $S_5$    | $H-3 \rightarrow L$ (49.1%)<br>$H-1 \rightarrow L+1$ (35.1%)   | 3.718  | 0.045 | 333.5                       | $^1\text{MLCT}/^1\text{ILCT}$               |
| $S_6$    | $H-2 \rightarrow L+1$ (98.2%)                                  | 3.825  | 0.010 | 324.1                       | $^1\text{MLCT}$                             |
| $S_7$    | $H-1 \rightarrow L+1$ (47.3%)<br>$H-3 \rightarrow L$ (23.2%)   | 3.907  | 0.240 | 317.3                       | $^1\text{ILCT}/^1\text{MLCT}$               |
| $S_8$    | $H-4 \rightarrow L$ (41.1%)                                    | 4.097  | 0.033 | 302.6                       | $^1\text{LLCT}/^1\text{MLCT}/^1\text{ILCT}$ |
| $S_9$    | $H \rightarrow L+2$ (36.8%)<br>$H-5 \rightarrow L$ (35.5%)     | 4.133  | 0.062 | 300                         | $^1\text{LLCT}/^1\text{MLCT}/^1\text{ILCT}$ |
| $S_{12}$ | $H-5 \rightarrow L+1$ (45.8%)<br>$H-7 \rightarrow L$ (20.7%)   | 4.405  | 0.072 | 281.5                       | $^1\text{ILCT}/^1\text{MLCT}$               |
| $S_{13}$ | $H-7 \rightarrow L$ (39.0%)<br>$H-1 \rightarrow L+2$ (31.9%)   | 4.578  | 0.076 | 270.8                       | $^1\text{LLCT}/^1\text{MLCT}/^1\text{ILCT}$ |
| $S_{20}$ | $H-7 \rightarrow L+1$ (38.5%)<br>$H \rightarrow L+6$ (12.7%)   | 4.952  | 0.110 | 250.4                       | $^1\text{LLCT}/^1\text{MLCT}$               |
| $S_{22}$ | $H-2 \rightarrow L+6$ (50.9%)<br>$H-2 \rightarrow L+5$ (27.7%) | 5.002  | 0.079 | 247.9                       | $^1\text{MLCT}$                             |
| $S_{24}$ | $H-3 \rightarrow L+2$ (32.1%)                                  | 5.140  | 0.451 | 241.2                       | $^1\text{MLCT}/^1\text{LLCT}$               |

|          |                                                                |       |       |       |                                   |
|----------|----------------------------------------------------------------|-------|-------|-------|-----------------------------------|
| $S_{25}$ | $H-1 \rightarrow L+6$ (37.4%)<br>$H-1 \rightarrow L+5$ (28.5%) | 5.151 | 0.057 | 240.7 | ${}^1\text{MLCT}/{}^1\text{LLCT}$ |
| $S_{26}$ | $H-3 \rightarrow L+2$ (17.5%)<br>$H-7 \rightarrow L+1$ (16.4%) | 5.176 | 0.063 | 239.5 | ${}^1\text{MLCT}/{}^1\text{LLCT}$ |
| $S_{28}$ | $H \rightarrow L+7$ (62.8%)<br>$H-1 \rightarrow L+3$ (12.6%)   | 5.253 | 0.036 | 236   | ${}^1\text{LLCT}/{}^1\text{MLCT}$ |
| $S_{32}$ | $H-1 \rightarrow L+4$ (48.2%)<br>$H-1 \rightarrow L+3$ (12.0%) | 5.353 | 0.058 | 231.6 | ${}^1\text{LLCT}/{}^1\text{MLCT}$ |
| $S_{33}$ | $H-2 \rightarrow L+4$ (51.9%)<br>$H-9 \rightarrow L+1$ (32.0%) | 5.375 | 0.032 | 230.7 | ${}^1\text{MLCT}$                 |
| $S_{36}$ | $H-10 \rightarrow L$ (42.1%)<br>$H-5 \rightarrow L+2$ (15.4%)  | 5.460 | 0.378 | 227.1 | ${}^1\text{ILCT}/{}^1\text{MLCT}$ |
| $S_{37}$ | $H-1 \rightarrow L+5$ (37.7%)<br>$H-1 \rightarrow L+6$ (22.9%) | 5.474 | 0.034 | 226.5 | ${}^1\text{LLCT}/{}^1\text{MLCT}$ |

### 3b

| State    | Major contribution (%)                                         | E (eV) | $f$   | $\lambda_{\text{cal}}$ (nm) | Assignment                                      |
|----------|----------------------------------------------------------------|--------|-------|-----------------------------|-------------------------------------------------|
| $S_4$    | $H \rightarrow L+1$ (52.4%)<br>$H-3 \rightarrow L$ (27.0%)     | 3.836  | 0.023 | 323.3                       | ${}^1\text{LLCT}/{}^1\text{MLCT}$               |
| $S_5$    | $H \rightarrow L+1$ (33.5%)<br>$H-3 \rightarrow L$ (31.6%)     | 3.845  | 0.026 | 322.4                       | ${}^1\text{LLCT}/{}^1\text{MLCT}$               |
| $S_7$    | $H-1 \rightarrow L+1$ (54.9%)                                  | 4.010  | 0.210 | 309.2                       | ${}^1\text{MLCT}/{}^1\text{LLCT}/{}^1\text{IL}$ |
| $S_{11}$ | $H-3 \rightarrow L+1$ (44.6%)<br>$H-3 \rightarrow L$ (13.8%)   | 4.247  | 0.099 | 291.9                       | ${}^1\text{MLCT}/{}^1\text{LLCT}$               |
| $S_{17}$ | $H-2 \rightarrow L+3$ (23.9%)<br>$H-5 \rightarrow L+1$ (22.7%) | 4.503  | 0.062 | 275.4                       | ${}^1\text{MLCT}/{}^1\text{ILCT}$               |
| $S_{18}$ | $H-1 \rightarrow L+3$ (46.3%)<br>$H-7 \rightarrow L$ (11.3%)   | 4.518  | 0.029 | 274.4                       | ${}^1\text{LLCT}/{}^1\text{MLCT}$               |
| $S_{20}$ | $H-7 \rightarrow L$ (32.7%)<br>$H-1 \rightarrow L+5$ (19.8%)   | 4.635  | 0.034 | 267.5                       | ${}^1\text{ILCT}/{}^1\text{MLCT}$               |
| $S_{32}$ | $H-8 \rightarrow L$ (66.0%)<br>$H-9 \rightarrow L$ (28.3%)     | 4.950  | 0.065 | 250.7                       | ${}^1\text{LLCT}/{}^1\text{MLCT}$               |
| $S_{35}$ | $H-6 \rightarrow L+2$ (34.2%)                                  | 5.040  | 0.060 | 246.0                       | ${}^1\text{LLCT}/{}^1\text{MLCT}$               |
| $S_{36}$ | $H-7 \rightarrow L+1$ (41.4%)<br>$H-3 \rightarrow L+5$ (13.4%) | 5.073  | 0.026 | 244.4                       | ${}^1\text{MLCT}$                               |
| $S_{39}$ | $H-12 \rightarrow L$ (30.5%)<br>$H-13 \rightarrow L$ (17.3%)   | 5.109  | 0.097 | 242.7                       | ${}^1\text{LLCT}$                               |
| $S_{40}$ | $H-3 \rightarrow L+4$ (24.6%)<br>$H-12 \rightarrow L$ (14.3%)  | 5.132  | 0.050 | 241.6                       | ${}^1\text{MLCT}/{}^1\text{LLCT}$               |
| $S_{43}$ | $H-2 \rightarrow L+10$ (16.7%)<br>$H \rightarrow L+10$ (12.4%) | 5.195  | 0.037 | 238.7                       | ${}^1\text{MLCT}/{}^1\text{LLCT}$               |

## 3c

| State    | Major contribution (%)                                                                          | E (eV) | $f$   | $\lambda_{\text{cal}}$ (nm) | Assignment                    |
|----------|-------------------------------------------------------------------------------------------------|--------|-------|-----------------------------|-------------------------------|
| $S_4$    | $H-3 \rightarrow L$ (59.5%)<br>$H-1 \rightarrow L+1$ (24.4%)                                    | 3.826  | 0.054 | 324.0                       | $^1\text{MLCT}/^1\text{LLCT}$ |
| $S_7$    | $H-1 \rightarrow L+1$ (56.5%)<br>$H-3 \rightarrow L$ (15.7%)                                    | 4.002  | 0.205 | 309.8                       | $^1\text{ILCT}/^1\text{MLCT}$ |
| $S_9$    | $H-3 \rightarrow L+1$ (36.5%)<br>$H-5 \rightarrow L$ (15.5%)                                    | 4.233  | 0.075 | 292.9                       | $^1\text{MLCT}/^1\text{LLCT}$ |
| $S_{15}$ | $H-5 \rightarrow L+1$ (38.9%)                                                                   | 4.503  | 0.088 | 275.3                       | $^1\text{ILCT}/^1\text{MLCT}$ |
| $S_{17}$ | $H-7 \rightarrow L$ (37.5%)<br>$H-1 \rightarrow L+4$ (24.8%)                                    | 4.635  | 0.043 | 267.5                       | $^1\text{ILCT}/^1\text{MLCT}$ |
| $S_{27}$ | $H-7 \rightarrow L+1$ (47.2%)<br>$H-3 \rightarrow L+4$ (21.8%)                                  | 5.066  | 0.044 | 244.7                       | $^1\text{ILCT}/^1\text{MLCT}$ |
| $S_{28}$ | $H-11 \rightarrow L$ (35.8%)<br>$H-12 \rightarrow L$ (25.4%)                                    | 5.084  | 0.063 | 243.9                       | $^1\text{LLCT}$               |
| $S_{30}$ | $H-3 \rightarrow L+3$ (12.7%)<br>$H-3 \rightarrow L+4$ (12.2%)                                  | 5.121  | 0.196 | 242.1                       | $^1\text{MLCT}/^1\text{LLCT}$ |
| $S_{31}$ | $H \rightarrow L+8$ (26.1%)<br>$H-2 \rightarrow L+8$ (22.2%)                                    | 5.128  | 0.103 | 241.8                       | $^1\text{MLCT}/^1\text{LLCT}$ |
| $S_{32}$ | $H \rightarrow L+5$ (59.9%)                                                                     | 5.156  | 0.060 | 240.5                       | $^1\text{MLCT}/^1\text{LLCT}$ |
| $S_{33}$ | $H \rightarrow L+8$ (29.8%)<br>$H-6 \rightarrow L+4$ (11.3%)                                    | 5.159  | 0.109 | 240.3                       | $^1\text{MLCT}/^1\text{LLCT}$ |
| $S_{37}$ | $H-3 \rightarrow L+3$ (40.6%)<br>$H-3 \rightarrow L+4$ (30.5%)                                  | 5.283  | 0.081 | 234.7                       | $^1\text{MLCT}/^1\text{LLCT}$ |
| $S_{38}$ | $H-1 \rightarrow L+5$ (16.7%)<br>$H-6 \rightarrow L+2$ (12.9%)                                  | 5.293  | 0.046 | 234.2                       | $^1\text{LLCT}/^1\text{MLCT}$ |
| $S_{39}$ | $H-6 \rightarrow L+2$ (26.5%)<br>$H-1 \rightarrow L+8$ (18.9%)<br>$H-1 \rightarrow L+6$ (15.3%) | 5.297  | 0.105 | 234.0                       | $^1\text{LLCT}/^1\text{MLCT}$ |
| $S_{41}$ | $H-5 \rightarrow L+2$ (37.1%)<br>$H-1 \rightarrow L+5$ (30.8%)                                  | 5.366  | 0.056 | 231.1                       | $^1\text{LLCT}/^1\text{MLCT}$ |
| $S_{42}$ | $H-5 \rightarrow L+2$ (34.5%)<br>$H-9 \rightarrow L+1$ (22.9%)                                  | 5.374  | 0.035 | 230.7                       | $^1\text{LLCT}/^1\text{MLCT}$ |
| $S_{43}$ | $H \rightarrow L+5$ (24.4%)<br>$H-8 \rightarrow L+2$ (10.8%)                                    | 5.385  | 0.045 | 230.2                       | $^1\text{LLCT}/^1\text{MLCT}$ |
| $S_{44}$ | $H \rightarrow L+6$ (39.3%)<br>$H \rightarrow L+10$ (13.2%)                                     | 5.397  | 0.067 | 229.7                       | $^1\text{LLCT}/^1\text{MLCT}$ |

## 4a

| State | Major contribution (%)                                       | E (eV) | $f$   | $\lambda_{\text{cal}}$ (nm) | Assignment                    |
|-------|--------------------------------------------------------------|--------|-------|-----------------------------|-------------------------------|
| $S_4$ | $H-3 \rightarrow L$ (51.5%)<br>$H \rightarrow L+1$ (34.8%)   | 3.382  | 0.044 | 323.6                       | $^1\text{MLCT}/^1\text{ILCT}$ |
| $S_7$ | $H \rightarrow L+1$ (49.6%)<br>$H-3 \rightarrow L$ (24.9%)   | 3.998  | 0.216 | 310.1                       | $^1\text{MLCT}/^1\text{LLCT}$ |
| $S_8$ | $H-3 \rightarrow L+1$ (65.7%)<br>$H-7 \rightarrow L$ (18.1%) | 4.213  | 0.025 | 294.3                       | $^1\text{MLCT}/^1\text{ILCT}$ |
| $S_9$ | $H-4 \rightarrow L$ (48.5%)                                  | 4.265  | 0.058 | 290.7                       | $^1\text{LLCT}$               |

|          |                                                                                               |       |       |       |                                                   |
|----------|-----------------------------------------------------------------------------------------------|-------|-------|-------|---------------------------------------------------|
| $S_{11}$ | $H-5 \rightarrow L$ (61.7%)<br>$H-4 \rightarrow L$ (28.0%)                                    | 4.426 | 0.022 | 280.1 | ${}^1\text{ILCT}/{}^1\text{MLCT}$                 |
| $S_{12}$ | $H-5 \rightarrow L+1$ (32.5%)<br>$H-7 \rightarrow L$ (20.6%)                                  | 4.498 | 0.059 | 275.6 | ${}^1\text{ILCT}/{}^1\text{MLCT}/{}^1\text{LLCT}$ |
| $S_{13}$ | $H-7 \rightarrow L$ (40.8%)<br>$H-1 \rightarrow L+2$ (35.3%)                                  | 4.672 | 0.058 | 265.4 | ${}^1\text{LLCT}/{}^1\text{MLCT}$                 |
| $S_{14}$ | $H-2 \rightarrow L+2$ (89.8%)                                                                 | 4.790 | 0.020 | 258.8 | ${}^1\text{MLCT}/{}^1\text{LLCT}$                 |
| $S_{16}$ | $H-2 \rightarrow L+4$ (46.5%)<br>$H-2 \rightarrow L+6$ (25.9%)                                | 4.818 | 0.048 | 257.3 | ${}^1\text{MLCT}$                                 |
| $S_{22}$ | $H-7 \rightarrow L+1$ (52.1%)                                                                 | 5.069 | 0.103 | 244.6 | ${}^1\text{LLCT}/{}^1\text{MLCT}$                 |
| $S_{25}$ | $H-3 \rightarrow L+2$ (40.8%)                                                                 | 5.201 | 0.500 | 238.4 | ${}^1\text{MLCT}$                                 |
| $S_{26}$ | $H-7 \rightarrow L+1$ (23.2%)<br>$H-3 \rightarrow L+2$ (14.9%)<br>$H \rightarrow L+5$ (13.1%) | 5.216 | 0.133 | 237.7 | ${}^1\text{LLCT}/{}^1\text{MLCT}$                 |
| $S_{29}$ | $H \rightarrow L+3$ (69.8%)<br>$H \rightarrow L+5$ (21.9%)                                    | 5.324 | 0.107 | 232.9 | ${}^1\text{LLCT}/{}^1\text{MLCT}$                 |
| $S_{30}$ | $H-2 \rightarrow L+6$ (53.8%)<br>$H-2 \rightarrow L+4$ (31.0%)                                | 5.385 | 0.040 | 230.2 | ${}^1\text{MLCT}$                                 |
| $S_{32}$ | $H-2 \rightarrow L+5$ (65.4%)                                                                 | 5.419 | 0.040 | 228.8 | ${}^1\text{MLCT}$                                 |
| $S_{33}$ | $H \rightarrow L+5$ (50.1%)<br>$H \rightarrow L+3$ (13.7%)                                    | 5.426 | 0.056 | 228.5 | ${}^1\text{LLCT}/{}^1\text{MLCT}$                 |
| $S_{36}$ | $H-10 \rightarrow L$ (48.9%)<br>$H-5 \rightarrow L+2$ (12.1%)                                 | 5.555 | 0.291 | 223.2 | ${}^1\text{ILCT}/{}^1\text{MLCT}$                 |
| $S_{43}$ | $H \rightarrow L+7$ (24.1%)<br>$H-5 \rightarrow L+2$ (22.5%)                                  | 5.810 | 0.136 | 213.4 | ${}^1\text{ILCT}/{}^1\text{MLCT}$                 |
| $S_{44}$ | $H-1 \rightarrow L+4$ (22.3%)<br>$H-1 \rightarrow L+6$ (21.3%)                                | 5.826 | 0.375 | 212.8 | ${}^1\text{MLCT}/{}^1\text{LLCT}$                 |
| $S_{49}$ | $H-7 \rightarrow L+3$ (53.9%)<br>$H \rightarrow L+7$ (18.1%)                                  | 5.926 | 0.059 | 204.4 | ${}^1\text{MLCT}/{}^1\text{ILCT}$                 |

**Table S4.** Molecular orbital contribution (%) in the triplet state for all complexes.

| <i>1a</i> |        | Contribution (%) |     |                                           |                                                      | Orbital interpretation (from high effect to minimum)                      |
|-----------|--------|------------------|-----|-------------------------------------------|------------------------------------------------------|---------------------------------------------------------------------------|
| Orbitals  | E (eV) | Pt               | bzq | Me                                        | P-(Ph) <sub>2</sub> (C <sub>3</sub> H <sub>5</sub> ) |                                                                           |
| HOMO-1    | -5.406 | 69               | 18  | 9                                         | 4                                                    | d(Pt) + $\pi$ (bzq)                                                       |
| HOMO      | -5.275 | 33               | 63  | 1                                         | 3                                                    | $\pi$ (bzq) + d(Pt)                                                       |
| LUMO      | -1.807 | 4                | 94  | 1                                         | 1                                                    | $\pi^*$ (bzq)                                                             |
| <i>1b</i> |        | Contribution (%) |     |                                           |                                                      | Orbital interpretation (from high effect to minimum)                      |
| Orbitals  | E (eV) | Pt               | bzq | Me                                        | S-(Me) <sub>2</sub>                                  |                                                                           |
| HOMO-1    | -5.527 | 88               | 7   | 3                                         | 2                                                    | d(Pt)                                                                     |
| HOMO      | -5.387 | 28               | 69  | -                                         | 3                                                    | $\pi$ (bzq) + d(Pt)                                                       |
| LUMO      | -1.651 | 4                | 94  | 1                                         | 1                                                    | $\pi^*$ (bzq)                                                             |
| <i>2a</i> |        | Contribution (%) |     |                                           |                                                      | Orbital interpretation (from high effect to minimum)                      |
| Orbitals  | E (eV) | Pt               | bzq | S-(Ph)                                    | P-(Ph) <sub>3</sub>                                  |                                                                           |
| HOMO-1    | -5.527 | 16               | 75  | 1                                         | 7                                                    | $\pi$ (bzq) + d(Pt)                                                       |
| HOMO      | -5.387 | 6                | 7   | 3                                         | 84                                                   | $\pi$ (P-Ph <sub>3</sub> )                                                |
| LUMO      | -1.651 | 2                | 95  | 3                                         | -                                                    | $\pi^*$ (bzq)                                                             |
| <i>2b</i> |        | Contribution (%) |     |                                           |                                                      | Orbital interpretation (from high effect to minimum)                      |
| Orbitals  | E (eV) | Pt               | bzq | S-(py)                                    | P-(Ph) <sub>3</sub>                                  |                                                                           |
| HOMO-1    | -5.527 | 24               | 37  | 2                                         | 36                                                   | $\pi$ (bzq) + $\pi$ (P-Ph <sub>3</sub> ) + d(Pt)                          |
| HOMO      | -5.387 | 9                | 8   | 3                                         | 81                                                   | $\pi$ (P-Ph <sub>3</sub> )                                                |
| LUMO      | -1.651 | 3                | 91  | 5                                         | 1                                                    | $\pi^*$ (bzq)                                                             |
| <i>3a</i> |        | Contribution (%) |     |                                           |                                                      | Orbital interpretation (from high effect to minimum)                      |
| Orbitals  | E (eV) | Pt               | bzq | <i>p</i> -MeC <sub>6</sub> H <sub>4</sub> | S(Me) <sub>2</sub>                                   |                                                                           |
| HOMO-1    | -5.527 | 25               | 5   | 66                                        | 4                                                    | d(Pt) + $\pi$ ( <i>p</i> -MeC <sub>6</sub> H <sub>4</sub> )               |
| HOMO      | -5.387 | 22               | 76  | -                                         | 2                                                    | $\pi$ (bzq) + d(Pt)                                                       |
| LUMO      | -1.651 | 2                | 96  | 2                                         | -                                                    | $\pi^*$ (bzq)                                                             |
| <i>3b</i> |        | Contribution (%) |     |                                           |                                                      | Orbital interpretation (from high effect to minimum)                      |
| Orbitals  | E (eV) | Pt               | bzq | <i>p</i> -MeC <sub>6</sub> H <sub>4</sub> | P(Ph) <sub>2</sub> (Me)                              |                                                                           |
| HOMO-1    | -5.527 | 18               | 50  | 27                                        | 5                                                    | $\pi$ (bzq) + $\pi$ ( <i>p</i> -MeC <sub>6</sub> H <sub>4</sub> ) + d(Pt) |
| HOMO      | -5.387 | 20               | 32  | 42                                        | 6                                                    | $\pi$ ( <i>p</i> -MeC <sub>6</sub> H <sub>4</sub> ) + $\pi$ (bzq) + d(Pt) |
| LUMO      | -1.651 | 2                | 95  | 2                                         | 1                                                    | $\pi^*$ (bzq)                                                             |
| <i>3c</i> |        | Contribution (%) |     |                                           |                                                      | Orbital interpretation (from high effect to minimum)                      |
| Orbitals  | E (eV) | Pt               | bzq | <i>p</i> -MeC <sub>6</sub> H <sub>4</sub> | P(Ph)(Me) <sub>2</sub>                               |                                                                           |
| HOMO-1    | -5.527 | 19               | 60  | 17                                        | 4                                                    | $\pi$ (bzq) + d(Pt) + $\pi$ ( <i>p</i> -MeC <sub>6</sub> H <sub>4</sub> ) |
| HOMO      | -5.387 | 19               | 23  | 51                                        | 7                                                    | $\pi$ ( <i>p</i> -MeC <sub>6</sub> H <sub>4</sub> ) + $\pi$ (bzq) + d(Pt) |
| LUMO      | -1.651 | 2                | 94  | 2                                         | 2                                                    | $\pi^*$ (bzq)                                                             |
| <i>4a</i> |        | Contribution (%) |     |                                           |                                                      | Orbital interpretation (from high effect to minimum)                      |
| Orbitals  | E (eV) | Pt               | bzq | Ph                                        | S-(Me) <sub>2</sub>                                  |                                                                           |
| HOMO-1    | -5.527 | 44               | 6   | 45                                        | 5                                                    | d(Pt) + $\pi$ (Ph)                                                        |
| HOMO      | -5.387 | 31               | 66  | -                                         | 2                                                    | $\pi$ (bzq) + d(Pt)                                                       |
| LUMO      | -1.651 | 3                | 94  | 3                                         | -                                                    | $\pi^*$ (bzq)                                                             |

**Table S5.** Optical properties and Exciton generation fractions  $\chi_T$  (%) of selected systems determined by TD-DFT level. All energetic values are in eV and the notations are defined as “p, v, g” respectively stands for phosphorescence, vertical, and gap.

| Complex | $\Delta E_{\text{gap}}$ | $E_{T1-p}$<br>(eV) | $E_{T1-ver}$<br>(eV) | $E_{S1-ver}$<br>(eV) | $E_{S1-T1}$<br>(gap/ver) | $E_g - E_{S1-ver}$ | $E_g - E_{T1-ver}$ | $\delta_S / \delta_T$ | $\chi_T(\%)$ |
|---------|-------------------------|--------------------|----------------------|----------------------|--------------------------|--------------------|--------------------|-----------------------|--------------|
| 1a      | 3.776                   | 2.28               | 2.591                | 3.22                 | 0.63                     | 0.56               | 1.18               | 0.47                  | 86.48        |
| 1b      | 3.736                   | 2.35               | 2.568                | 3.20                 | 0.63                     | 0.53               | 1.17               | 0.46                  | 86.79        |
| 2a      | 2.681                   | 1.83               | 1.988                | 2.39                 | 0.40                     | 0.29               | 0.69               | 0.42                  | 87.68        |
| 2b      | 3.265                   | 1.84               | 2.569                | 2.95                 | 0.38                     | 0.32               | 0.70               | 0.45                  | 86.89        |
| 3a      | 3.646                   | 2.23               | 2.705                | 3.23                 | 0.53                     | 0.42               | 0.94               | 0.44                  | 87.16        |
| 3b      | 3.717                   | 2.22               | 2.850                | 3.35                 | 0.50                     | 0.37               | 0.87               | 0.42                  | 87.63        |
| 3c      | 4.277                   | 2.20               | 2.833                | 3.34                 | 0.51                     | 0.36               | 0.87               | 0.41                  | 87.89        |
| 4a      | 3.857                   | 2.23               | 2.852                | 3.36                 | 0.51                     | 0.50               | 1.01               | 0.49                  | 85.85        |



**Table S6.** The xyz coordinates of the optimized structure of our eight complexes.

| <b>1a</b> |          |          |          | <b>1b</b> |          |          |          |
|-----------|----------|----------|----------|-----------|----------|----------|----------|
| Pt        | 0.38518  | 2.09012  | 6.84288  | Pt        | 1.93425  | 8.36869  | 2.87255  |
| P         | 0.58265  | 2.27340  | 4.47287  | S         | 3.72222  | 9.30287  | 4.24491  |
| N         | 2.32980  | 1.24559  | 7.42344  | C         | 0.38097  | 7.78515  | 1.72075  |
| C         | 0.22079  | 2.14630  | 8.89056  | C         | 3.77687  | 8.38025  | 5.82471  |
| C         | -0.80807 | 2.62966  | 9.70215  | H         | 4.63597  | 8.72317  | 6.42007  |
| H         | -1.71783 | 3.03118  | 9.25143  | H         | 3.83658  | 7.29993  | 5.63376  |
| C         | -0.71729 | 2.61834  | 11.11195 | H         | 2.84085  | 8.60834  | 6.35240  |
| H         | -1.55180 | 3.00809  | 11.70251 | C         | 5.32821  | 8.80088  | 3.52394  |
| C         | 0.40347  | 2.12016  | 11.75864 | H         | 6.14517  | 9.13163  | 4.18224  |
| H         | 0.46321  | 2.10751  | 12.85000 | H         | 5.40446  | 9.30517  | 2.55102  |
| C         | 1.48287  | 1.62322  | 10.99380 | H         | 5.35781  | 7.71250  | 3.37666  |
| C         | 1.37468  | 1.65510  | 9.57328  | C         | -1.93897 | 7.36911  | 0.08243  |
| C         | 2.67661  | 1.08618  | 11.59197 | H         | -2.82041 | 7.20130  | -0.54180 |
| H         | 2.74564  | 1.06549  | 12.68333 | C         | 0.54905  | 12.66749 | 2.74523  |
| C         | 3.70545  | 0.60438  | 10.83287 | H         | 0.87625  | 13.62829 | 3.14582  |
| H         | 4.60229  | 0.19306  | 11.30323 | C         | -2.44564 | 9.82037  | 0.20007  |
| C         | 3.63342  | 0.62700  | 9.39706  | H         | -3.33098 | 9.66654  | -0.42349 |
| C         | 2.46925  | 1.16806  | 8.78502  | C         | -1.63699 | 8.67553  | 0.52952  |
| C         | 3.31167  | 0.76181  | 6.65900  | C         | -2.13399 | 11.07506 | 0.64427  |
| H         | 3.16894  | 0.82951  | 5.58216  | H         | -2.76152 | 11.93105 | 0.38313  |
| C         | 4.48754  | 0.19711  | 7.18249  | C         | -1.11123 | 6.31596  | 0.44272  |
| H         | 5.24927  | -0.17612 | 6.49640  | H         | -1.34508 | 5.30490  | 0.09657  |
| C         | 4.65424  | 0.13672  | 8.55548  | C         | -0.58862 | 12.56128 | 1.96103  |
| H         | 5.56109  | -0.28796 | 8.99440  | H         | -1.18974 | 13.44285 | 1.72267  |
| C         | -1.56858 | 2.75500  | 6.64992  | C         | -0.16313 | 10.17996 | 1.80091  |
| H         | -2.20629 | 2.20159  | 7.35895  | C         | 0.03100  | 6.51818  | 1.24901  |
| H         | -2.02009 | 2.61928  | 5.65132  | H         | 0.64662  | 5.65305  | 1.50164  |
| H         | -1.63554 | 3.82938  | 6.90481  | C         | -0.48162 | 8.85968  | 1.34079  |
| C         | -0.04168 | 3.97576  | 3.93579  | C         | 1.29544  | 11.51078 | 3.02901  |
| H         | -1.09687 | 4.00996  | 4.24229  | H         | 2.19705  | 11.56324 | 3.64313  |
| H         | 0.50092  | 4.66285  | 4.60900  | C         | -0.97425 | 11.29739 | 1.46499  |
| C         | 0.13014  | 4.39676  | 2.50790  | N         | 0.95827  | 10.30189 | 2.57598  |
| H         | 1.16061  | 4.45424  | 2.13789  | C         | 2.67008  | 6.45273  | 3.01359  |
| C         | -0.87373 | 4.72839  | 1.68749  | H         | 1.91904  | 5.78589  | 3.47565  |
| H         | -1.91820 | 4.68965  | 2.01318  | H         | 2.89736  | 6.05322  | 2.00816  |
| H         | -0.68436 | 5.05468  | 0.66121  | H         | 3.59467  | 6.36266  | 3.61397  |
| C         | -0.39548 | 1.03893  | 3.49706  |           |          |          |          |
| C         | -0.53270 | 1.07970  | 2.09628  |           |          |          |          |
| H         | -0.04746 | 1.86715  | 1.51924  |           |          |          |          |
| C         | -1.29184 | 0.11280  | 1.43192  |           |          |          |          |
| H         | -1.39171 | 0.15762  | 0.34446  |           |          |          |          |
| C         | -1.92088 | -0.90805 | 2.15301  |           |          |          |          |
| H         | -2.51287 | -1.66314 | 1.62977  |           |          |          |          |
| C         | -1.78895 | -0.95850 | 3.54306  |           |          |          |          |
| H         | -2.27715 | -1.75216 | 4.11368  |           |          |          |          |
| C         | -1.03260 | 0.00924  | 4.21186  |           |          |          |          |
| H         | -0.93332 | -0.02136 | 5.29978  |           |          |          |          |
| C         | 2.27907  | 2.24177  | 3.70928  |           |          |          |          |
| C         | 3.17976  | 3.27004  | 4.05001  |           |          |          |          |
| H         | 2.86357  | 4.07575  | 4.71735  |           |          |          |          |
| C         | 4.48745  | 3.26603  | 3.56027  |           |          |          |          |
| H         | 5.16947  | 4.07483  | 3.83381  |           |          |          |          |
| C         | 4.92528  | 2.22717  | 2.73081  |           |          |          |          |
| H         | 5.94933  | 2.22211  | 2.34996  |           |          |          |          |
| C         | 4.04492  | 1.19490  | 2.39730  |           |          |          |          |
| H         | 4.37736  | 0.37677  | 1.75337  |           |          |          |          |
| C         | 2.73097  | 1.20084  | 2.88110  |           |          |          |          |
| H         | 2.05739  | 0.38608  | 2.61094  |           |          |          |          |

| <b>2a</b> |          |          |          |
|-----------|----------|----------|----------|
| Pt        | 2.63927  | 4.63917  | 3.12572  |
| N         | 1.07692  | 6.04716  | 3.49416  |
| C         | 3.20179  | 5.31552  | 5.00534  |
| C         | 4.27578  | 4.99934  | 5.84177  |
| H         | 5.01324  | 4.25393  | 5.54224  |
| C         | 4.45884  | 5.61481  | 7.10172  |
| H         | 5.31973  | 5.32520  | 7.71124  |
| C         | 3.57441  | 6.56977  | 7.57492  |
| H         | 3.72273  | 7.04008  | 8.55026  |
| C         | 2.46556  | 6.93912  | 6.78008  |
| C         | 2.30387  | 6.30733  | 5.51460  |
| C         | 1.18596  | 6.67897  | 4.70315  |
| C         | 0.24202  | 7.64926  | 5.12932  |
| C         | -0.82942 | 7.94796  | 4.25967  |
| H         | -1.57556 | 8.68997  | 4.55628  |
| C         | -0.92096 | 7.29611  | 3.04122  |
| H         | -1.73485 | 7.50184  | 2.34467  |
| C         | 0.05356  | 6.34620  | 2.68951  |
| H         | 0.03597  | 5.80585  | 1.73965  |
| P         | 4.37920  | 3.16496  | 2.83314  |
| S         | 1.75411  | 4.19515  | 0.89485  |
| C         | 4.33806  | 1.98780  | 1.39664  |
| C         | 4.54964  | 2.48639  | 0.09806  |
| C         | 4.09956  | 0.61718  | 1.57081  |
| C         | 4.54279  | 1.62274  | -0.99762 |
| H         | 4.72038  | 3.55190  | -0.05816 |
| C         | 4.08557  | -0.24438 | 0.46749  |
| H         | 3.92495  | 0.20900  | 2.56655  |
| C         | 4.31075  | 0.25431  | -0.81607 |
| H         | 4.71134  | 2.02375  | -1.99988 |
| H         | 3.89587  | -1.30937 | 0.61998  |
| H         | 4.30068  | -0.41894 | -1.67667 |
| C         | 6.01640  | 4.00838  | 2.58718  |
| C         | 6.15630  | 5.37088  | 2.89660  |
| C         | 7.12448  | 3.31012  | 2.07033  |
| C         | 7.38313  | 6.01648  | 2.71173  |
| H         | 5.29819  | 5.92553  | 3.27798  |
| C         | 8.34904  | 3.95776  | 1.89074  |
| H         | 7.02835  | 2.25982  | 1.78798  |
| C         | 8.48192  | 5.31252  | 2.21326  |
| H         | 7.47417  | 7.07787  | 2.95433  |
| H         | 9.19952  | 3.40237  | 1.48788  |
| H         | 9.43876  | 5.81961  | 2.06648  |
| C         | 4.59528  | 2.02277  | 4.28440  |
| C         | 5.84991  | 1.58126  | 4.73362  |
| C         | 3.43714  | 1.56449  | 4.93571  |
| C         | 5.94240  | 0.69639  | 5.81275  |
| H         | 6.76357  | 1.93459  | 4.25392  |
| C         | 3.53267  | 0.67173  | 6.00622  |
| H         | 2.45787  | 1.91454  | 4.60328  |
| C         | 4.78575  | 0.23704  | 6.44886  |
| H         | 6.92598  | 0.36734  | 6.15688  |
| H         | 2.62325  | 0.32307  | 6.50123  |
| H         | 4.86095  | -0.45398 | 7.29191  |
| C         | 1.50089  | 7.92296  | 7.19800  |
| C         | 0.43582  | 8.26569  | 6.41331  |
| H         | 1.63733  | 8.39984  | 8.17260  |
| H         | -0.28657 | 9.01458  | 6.74703  |
| C         | 0.83091  | 2.66803  | 0.94283  |
| C         | 0.56975  | 2.00379  | -0.27356 |
| C         | 0.30976  | 2.10818  | 2.12703  |
| C         | -0.18391 | 0.82922  | -0.30187 |
| H         | 0.96974  | 2.42037  | -1.20079 |
| C         | -0.43590 | 0.92606  | 2.09322  |
| H         | 0.48455  | 2.61769  | 3.07719  |
| C         | -0.68995 | 0.27728  | 0.88083  |
| H         | -0.37147 | 0.33573  | -1.25981 |
| H         | -0.82854 | 0.51343  | 3.02729  |
| H         | -1.27613 | -0.64452 | 0.85682  |

| <b>2b</b> |          |         |          |
|-----------|----------|---------|----------|
| Pt        | 3.47859  | 3.81722 | 12.30641 |
| S         | 5.53419  | 4.34766 | 13.53092 |
| P         | 2.11577  | 4.65095 | 14.02988 |
| N         | 4.60132  | 3.04518 | 10.64625 |
| N         | 4.97150  | 6.81602 | 12.60921 |
| C         | 1.92843  | 3.19521 | 11.07181 |
| C         | 3.82213  | 2.56018 | 9.65081  |
| C         | 2.40193  | 2.62598 | 9.85481  |
| C         | 1.55832  | 2.13183 | 8.84841  |
| C         | 2.13567  | 1.57729 | 7.64616  |
| H         | 1.46834  | 1.20154 | 6.88161  |
| C         | 5.82105  | 6.07854 | 13.30812 |
| C         | 1.17693  | 3.34038 | 14.93558 |
| C         | 2.74780  | 6.94143 | 15.59464 |
| H         | 2.16596  | 7.51683 | 14.89184 |
| C         | 2.90401  | 5.57022 | 15.42804 |
| C         | 1.30579  | 6.70530 | 12.34093 |
| H         | 2.31577  | 6.62881 | 11.96353 |
| C         | 4.36431  | 2.02226 | 8.47966  |
| C         | -0.85961 | 7.75164 | 12.28496 |
| H         | -1.53633 | 8.48394 | 11.86463 |
| C         | 1.14195  | 2.03727 | 14.44531 |
| H         | 1.65027  | 1.79383 | 13.52592 |
| C         | 0.44088  | 7.65123 | 11.81080 |
| H         | 0.78255  | 8.30300 | 11.01797 |
| C         | 0.88228  | 5.85443 | 13.36354 |
| C         | -0.31440 | 2.73636 | 10.20992 |
| H         | -1.38363 | 2.79159 | 10.37324 |
| C         | -0.42478 | 5.96284 | 13.83306 |
| H         | -0.78670 | 5.30697 | 14.60979 |
| C         | 0.16767  | 2.19558 | 9.04698  |
| H         | -0.50465 | 1.82138 | 8.28618  |
| C         | 3.67166  | 4.86245 | 16.35686 |
| H         | 3.82024  | 3.79925 | 16.23989 |
| C         | 3.46769  | 1.52414 | 7.46731  |
| H         | 3.88898  | 1.10748 | 6.56201  |
| C         | 5.90803  | 3.01563 | 10.50945 |
| H         | 6.47994  | 3.41490 | 11.33131 |
| C         | 6.97637  | 6.63786 | 13.88591 |
| H         | 7.64384  | 6.00833 | 14.45500 |
| C         | 0.52829  | 3.61821 | 16.14424 |
| H         | 0.56993  | 4.61173 | 16.56762 |
| C         | 5.23166  | 8.11018 | 12.45344 |
| H         | 4.50429  | 8.66667 | 11.87268 |
| C         | 0.55171  | 3.22814 | 11.20454 |
| H         | 0.09068  | 3.64188 | 12.08742 |
| C         | 4.08791  | 6.88234 | 17.59056 |
| H         | 4.54628  | 7.38977 | 18.42929 |
| C         | 4.25321  | 5.51080 | 17.43060 |
| H         | 4.84442  | 4.94711 | 18.13965 |
| C         | 5.76276  | 1.99963 | 8.35776  |
| H         | 6.21689  | 1.59073 | 7.46417  |
| C         | -0.19606 | 1.33292 | 16.31593 |
| H         | -0.72723 | 0.55638 | 16.85045 |
| C         | 6.53791  | 2.49682 | 9.37227  |
| H         | 7.61611  | 2.49899 | 9.31704  |
| C         | -0.15773 | 2.62648 | 16.82408 |
| H         | -0.65434 | 2.86030 | 17.75629 |
| C         | 0.45698  | 1.04021 | 15.13098 |
| H         | 0.44237  | 0.03442 | 14.73363 |
| C         | 3.33899  | 7.59479 | 16.67140 |
| H         | 3.20803  | 8.66270 | 16.78356 |
| C         | -1.29130 | 6.90441 | 13.29443 |
| H         | -2.30570 | 6.97113 | 13.66464 |
| C         | 7.22962  | 7.97794 | 13.71319 |
| H         | 8.11430  | 8.42513 | 14.14950 |
| C         | 6.33536  | 8.75095 | 12.97259 |
| H         | 6.49263  | 9.80733 | 12.80842 |

| <b>3a</b> |          |          |          |
|-----------|----------|----------|----------|
| Pt        | 1.94144  | 8.38413  | 2.86025  |
| S         | 3.76459  | 9.35033  | 4.29778  |
| C         | 0.39624  | 7.79258  | 1.68898  |
| C         | 3.82881  | 8.42124  | 5.85238  |
| H         | 4.64934  | 8.79939  | 6.46049  |
| H         | 3.94790  | 7.36003  | 5.65099  |
| H         | 2.88542  | 8.59360  | 6.36649  |
| C         | 5.36563  | 8.91463  | 3.56912  |
| H         | 6.16302  | 9.28535  | 4.21163  |
| H         | 5.42026  | 9.40724  | 2.60041  |
| H         | 5.43772  | 7.83829  | 3.43787  |
| C         | 2.73185  | 6.51304  | 3.01353  |
| C         | 3.68500  | 6.02351  | 2.11302  |
| H         | 4.00780  | 6.64384  | 1.28458  |
| C         | 4.23351  | 4.74770  | 2.22597  |
| H         | 4.96572  | 4.42121  | 1.49570  |
| C         | 3.85504  | 3.88604  | 3.24697  |
| C         | 2.89981  | 4.35132  | 4.14919  |
| H         | 2.56818  | 3.70480  | 4.95505  |
| C         | 2.35558  | 5.62270  | 4.03333  |
| H         | 1.60419  | 5.92341  | 4.75460  |
| C         | -1.89470 | 7.37549  | 0.04900  |
| H         | -2.76294 | 7.20679  | -0.57455 |
| C         | 0.48716  | 12.65150 | 2.75935  |
| H         | 0.79444  | 13.60371 | 3.16536  |
| C         | -2.43646 | 9.80846  | 0.18828  |
| H         | -3.30689 | 9.64844  | -0.43463 |
| C         | -1.60715 | 8.67025  | 0.51336  |
| C         | 4.43799  | 2.49778  | 3.37656  |
| H         | 5.17349  | 2.30396  | 2.59475  |
| H         | 3.66191  | 1.73191  | 3.29936  |
| H         | 4.93424  | 2.36156  | 4.34115  |
| C         | -2.14826 | 11.04214 | 0.64012  |
| H         | -2.77793 | 11.88541 | 0.38899  |
| C         | -1.06483 | 6.33755  | 0.39518  |
| H         | -1.28402 | 5.33859  | 0.03835  |
| C         | -0.63273 | 12.52674 | 1.97499  |
| H         | -1.24150 | 13.39112 | 1.74234  |
| C         | -0.17368 | 10.17846 | 1.79782  |
| C         | 0.06739  | 6.53905  | 1.20467  |
| H         | 0.68542  | 5.68754  | 1.44602  |
| C         | -0.47365 | 8.85396  | 1.31971  |
| C         | 1.23981  | 11.50557 | 3.03094  |
| H         | 2.12586  | 11.57094 | 3.64485  |
| C         | -0.99086 | 11.26838 | 1.47097  |
| N         | 0.92684  | 10.31635 | 2.57173  |

| <b>3b</b> |          |          |          |
|-----------|----------|----------|----------|
| Pt        | 1.42646  | 3.70591  | 2.54026  |
| P         | 0.51184  | 5.53548  | 3.88097  |
| N         | 3.24645  | 4.67858  | 1.72555  |
| C         | 2.20525  | 2.17464  | 1.40654  |
| C         | 3.69261  | 5.90155  | 1.89963  |
| C         | 1.75568  | 6.55215  | 4.80425  |
| C         | -2.43687 | 1.01973  | 3.91099  |
| C         | -3.61863 | 0.17653  | 4.33116  |
| C         | -2.18820 | 8.45420  | 2.72268  |
| C         | 2.75852  | 8.63186  | 5.51996  |
| C         | -2.51822 | 1.92077  | 2.85754  |
| C         | -1.20742 | 0.90920  | 4.55862  |
| C         | 3.68956  | 7.93807  | 6.27607  |
| C         | -1.01584 | 7.72134  | 0.76021  |
| C         | 3.59786  | 0.31964  | -0.25270 |
| C         | -1.96821 | 8.53458  | 1.35328  |
| C         | 2.42069  | -0.02050 | 0.36765  |
| C         | 5.83668  | 3.27652  | -0.52602 |
| C         | 1.79496  | 7.94441  | 4.78988  |
| C         | 4.86439  | 6.38550  | 1.31236  |
| C         | 5.59014  | 5.53897  | 0.51294  |
| C         | 2.70752  | 5.86337  | 5.56182  |
| C         | -1.41932 | 2.68379  | 2.46876  |
| C         | -0.48671 | 6.74423  | 2.91008  |
| C         | 5.35107  | 2.03486  | -0.70003 |
| C         | -1.45371 | 7.56715  | 3.49362  |
| C         | -0.17989 | 2.58931  | 3.10995  |
| C         | -0.28419 | 6.82830  | 1.53307  |
| C         | -0.11411 | 1.66830  | 4.16751  |
| C         | -0.60090 | 5.01542  | 5.25243  |
| C         | 1.73179  | 0.89216  | 1.18510  |
| C         | 3.66132  | 6.54900  | 6.29636  |
| C         | 3.42084  | 2.50746  | 0.75135  |
| C         | 4.12286  | 1.60950  | -0.06934 |
| C         | 5.13960  | 4.22845  | 0.30372  |
| C         | 3.94973  | 3.83494  | 0.93257  |
| H         | 0.80985  | 0.57055  | 1.64576  |
| H         | 2.01060  | -1.01311 | 0.22556  |
| H         | 4.12020  | -0.39088 | -0.88012 |
| H         | 5.87947  | 1.32751  | -1.32600 |
| H         | 6.75633  | 3.58489  | -1.00557 |
| H         | 6.50541  | 5.87343  | 0.04143  |
| H         | 5.17511  | 7.40244  | 1.49943  |
| H         | 3.11194  | 6.54772  | 2.53720  |
| H         | -1.54369 | 3.36732  | 1.63688  |
| H         | -3.45464 | 2.03378  | 2.32236  |
| H         | -4.53079 | 0.49474  | 3.82445  |
| H         | -3.45935 | -0.87892 | 4.09308  |
| H         | -3.79430 | 0.24396  | 5.40764  |
| H         | -1.10031 | 0.21268  | 5.38371  |
| H         | 0.82013  | 1.53116  | 4.69967  |
| H         | -0.07132 | 4.28349  | 5.86019  |
| H         | -0.87553 | 5.86351  | 5.87833  |
| H         | -1.48759 | 4.53797  | 4.84075  |
| H         | 2.71119  | 4.78083  | 5.56929  |
| H         | 4.38859  | 5.99852  | 6.87797  |
| H         | 4.43758  | 8.47460  | 6.84453  |
| H         | 2.77585  | 9.71350  | 5.49545  |
| H         | 1.08027  | 8.50502  | 4.20557  |
| H         | -2.93549 | 9.08092  | 3.19082  |
| H         | -2.54411 | 9.22519  | 0.75158  |
| H         | -1.64255 | 7.52274  | 4.55663  |
| H         | 0.43932  | 6.18287  | 1.05547  |
| H         | -0.84574 | 7.77021  | -0.30681 |

| <b>3c</b> |          |          |          |
|-----------|----------|----------|----------|
| Pt        | 4.28093  | 7.96526  | 3.09049  |
| P         | 6.04233  | 9.44269  | 3.88060  |
| N         | 5.52881  | 6.29180  | 2.35007  |
| C         | 2.82396  | 6.65191  | 2.46125  |
| C         | 5.56960  | 11.16048 | 4.33487  |
| C         | 3.33999  | 5.44054  | 1.92836  |
| C         | 7.17677  | 9.78687  | 1.35337  |
| C         | 3.13646  | 3.20191  | 0.92662  |
| C         | 8.18494  | 10.04560 | 0.43588  |
| C         | 6.83622  | 6.16908  | 2.32753  |
| C         | 4.47205  | 3.05086  | 0.89352  |
| C         | 1.44367  | 6.76368  | 2.47944  |
| C         | 4.77000  | 5.27135  | 1.88447  |
| C         | 2.90871  | 9.32841  | 3.72809  |
| C         | 0.97328  | 11.23730 | 4.62945  |
| C         | 7.45220  | 9.73019  | 2.72090  |
| C         | 5.34166  | 4.09489  | 1.37804  |
| C         | 0.61165  | 5.73787  | 1.99887  |
| C         | 2.52482  | 4.40342  | 1.44627  |
| C         | 1.46358  | 11.25862 | 3.32459  |
| C         | 7.49620  | 5.03584  | 1.84717  |
| C         | 2.39909  | 9.31641  | 5.03059  |
| C         | -0.04846 | 12.24909 | 5.09451  |
| C         | 6.73915  | 3.99535  | 1.36942  |
| C         | 1.13121  | 4.57287  | 1.48919  |
| C         | 1.45879  | 10.24554 | 5.47111  |
| C         | 6.80538  | 8.82485  | 5.43897  |
| C         | 2.40068  | 10.33313 | 2.88930  |
| C         | 9.48807  | 10.24089 | 0.87100  |
| C         | 8.76602  | 9.93251  | 3.14478  |
| C         | 9.77722  | 10.18153 | 2.22675  |
| H         | 1.10267  | 12.01209 | 2.63216  |
| H         | 2.73819  | 10.39275 | 1.86092  |
| H         | 2.72889  | 8.55582  | 5.72929  |
| H         | 1.09594  | 10.18616 | 6.49139  |
| H         | -0.96093 | 12.19782 | 4.49481  |
| H         | -0.32638 | 12.07920 | 6.13555  |
| H         | 0.33552  | 13.26975 | 5.01553  |
| H         | 5.16379  | 11.66617 | 3.46036  |
| H         | 4.79590  | 11.13417 | 5.10048  |
| H         | 6.44313  | 11.70434 | 4.69773  |
| H         | 5.99709  | 8.67600  | 6.15612  |
| H         | 7.29075  | 7.86314  | 5.27089  |
| H         | 7.52321  | 9.52723  | 5.86361  |
| H         | 6.16718  | 9.61926  | 1.00212  |
| H         | 10.27615 | 10.43658 | 0.15604  |
| H         | 9.01666  | 9.89692  | 4.19555  |
| H         | 10.79108 | 10.33197 | 2.57323  |
| H         | 7.95179  | 10.08731 | -0.61958 |
| H         | 0.98029  | 7.65681  | 2.87149  |
| H         | -0.46282 | 5.87174  | 2.03373  |
| H         | 0.48125  | 3.78864  | 1.12329  |
| H         | 2.49143  | 2.41369  | 0.56047  |
| H         | 4.91873  | 2.14586  | 0.50337  |
| H         | 7.21103  | 3.09987  | 0.98561  |
| H         | 8.57532  | 5.00080  | 1.85578  |
| H         | 7.41215  | 7.00318  | 2.69563  |

| <b>4a</b> |         |          |          |
|-----------|---------|----------|----------|
| Pt        | 4.73037 | 5.67967  | 7.64604  |
| C         | 5.45962 | 2.57266  | 7.37149  |
| H         | 4.57691 | 2.52085  | 6.75153  |
| C         | 6.22061 | 1.42440  | 7.60765  |
| H         | 5.92301 | 0.48407  | 7.16810  |
| C         | 7.33589 | 1.53158  | 8.40110  |
| H         | 7.95081 | 0.66481  | 8.60716  |
| C         | 7.68126 | 2.77498  | 8.94927  |
| C         | 8.83295 | 2.98230  | 9.79288  |
| H         | 9.46844 | 2.13614  | 10.01827 |
| C         | 9.10889 | 4.20226  | 10.28763 |
| H         | 9.97516 | 4.34819  | 10.91973 |
| C         | 8.27157 | 5.34401  | 9.99740  |
| C         | 8.54622 | 6.62467  | 10.50660 |
| H         | 9.41035 | 6.77933  | 11.13943 |
| C         | 7.70930 | 7.66690  | 10.19194 |
| H         | 7.91862 | 8.65503  | 10.58315 |
| C         | 6.58213 | 7.48355  | 9.37104  |
| H         | 5.95842 | 8.33799  | 9.15589  |
| C         | 6.26595 | 6.24446  | 8.84335  |
| C         | 7.14320 | 5.17841  | 9.18008  |
| C         | 6.85653 | 3.86863  | 8.65564  |
| C         | 3.92344 | 7.54737  | 7.55630  |
| C         | 4.29080 | 8.47061  | 6.56469  |
| H         | 5.04426 | 8.19833  | 5.83454  |
| C         | 3.73194 | 9.74193  | 6.49147  |
| H         | 4.04930 | 10.42300 | 5.71033  |
| C         | 2.77878 | 10.14554 | 7.41593  |
| H         | 2.34418 | 11.13564 | 7.36353  |
| C         | 2.40135 | 9.25974  | 8.41533  |
| H         | 1.66747 | 9.55978  | 9.15434  |
| C         | 2.96509 | 7.99013  | 8.48153  |
| H         | 2.65695 | 7.33319  | 9.28680  |
| C         | 2.85398 | 5.72547  | 4.64543  |
| H         | 2.03862 | 5.35970  | 4.02300  |
| H         | 3.80038 | 5.57764  | 4.12921  |
| H         | 2.72479 | 6.77867  | 4.87994  |
| C         | 1.31323 | 5.14381  | 6.90544  |
| H         | 1.23087 | 6.21410  | 7.07466  |
| H         | 1.25808 | 4.61623  | 7.85552  |
| H         | 0.52228 | 4.78966  | 6.24587  |
| N         | 5.76068 | 3.74818  | 7.87216  |
| S         | 2.92132 | 4.74741  | 6.16964  |
